# Supplementary material for: Effectiveness of nationwide programmatic testing and treatment for latent tuberculosis infection in migrants in England: a retrospective, population-based cohort study
Source: PubMed Central journal article supplement — Lancet Public Health. 2022 Mar 23;7(4):e305–15. doi: 10.1016/S2468-2667(22)00031-7 (PMC8967722; doi:10.1016/s2468-2667(22)00031-7), 2022-03-23
Supplement: mmc1.pdf [file mmc1.pdf]

# THE LANCET

## Public Health

### **Supplementary appendix**

This appendix formed part of the original submission and has been peer reviewed. We post it as supplied by the authors.

Supplement to: Berrocal-Almanza LC, Harris RJ, Collin SM, et al. Effectiveness of nationwide programmatic testing and treatment for latent tuberculosis infection in migrants in England: a retrospective, population-based cohort study. *Lancet Public Health* 2022; published online March 23. [https://doi.org/10.1016/S2468-2667\(22\)00031-7](https://doi.org/10.1016/S2468-2667(22)00031-7).

1  
2  
3  
4

## Supplementary Appendix

### Effectiveness of nationwide programmatic latent tuberculosis infection testing and treatment in migrants in England.

|                                  | Table of Contents                                                                                                                                | Page Numbers |
|----------------------------------|--------------------------------------------------------------------------------------------------------------------------------------------------|--------------|
| Methods                          | Author contributions                                                                                                                             | 3            |
|                                  | Evaluation design and participants                                                                                                               | 4            |
|                                  | Data sources                                                                                                                                     | 4            |
|                                  | Record linkage                                                                                                                                   | 4            |
| Statistical analysis             | Survival analysis                                                                                                                                | 5            |
|                                  | Multiple imputation                                                                                                                              | 5            |
| Results and sensitivity analysis | Effectiveness of the LTBI testing and treatment programme                                                                                        | 6            |
|                                  | Risk of progression to active tuberculosis in IGRA positive migrants                                                                             | 7            |
|                                  | Effectiveness of LTBI treatment                                                                                                                  | 7            |
| Figure S1                        | Marginal effects of effect modification                                                                                                          | 9            |
| Figure S2                        | Unadjusted Kaplan Meier curve comparing TB-free survival between migrants tested and not tested for LTBI.                                        | 9            |
| Figure S3                        | Survival functions for risk of progression according to IGRA status.                                                                             | 10           |
| Figure S4                        | Survival functions for risk of progression according to treatment status.                                                                        | 10           |
| Table S1                         | Country and region of origin of evaluation participants                                                                                          | 11           |
| Table S2                         | Percentage of missing information, variables and models used for multiple imputation                                                             | 12           |
| Table S3                         | Hazard ratios from univariate and multivariate Cox regression models predicting the time to TB diagnosis                                         | 12           |
| Table S4                         | Predicted marginal effects of the effect modification between pre-entry active TB screening and year of UK arrival or primary care registration. | 14           |
| Table S5                         | Hazard ratios from multivariate Cox regression model predicting the time to TB diagnosis.                                                        | 14           |
| Table S6                         | Hazard ratios from multivariate Cox regression model predicting the time to TB diagnosis.                                                        | 16           |

|           |                                                                                                                                                                                                                     |    |
|-----------|---------------------------------------------------------------------------------------------------------------------------------------------------------------------------------------------------------------------|----|
| Table S7  | Time ratios from multivariate parametric Log Normal regression model predicting the time to TB diagnosis                                                                                                            | 17 |
| Table S8  | Hazard ratios from multivariate Cox regression model predicting the time to TB diagnosis according to IGRA status                                                                                                   | 18 |
| Table S9  | Hazard ratios from multivariate Cox regression model predicting the time to TB diagnosis according to IGRA status.                                                                                                  | 19 |
| Table S10 | Hazard ratios from multivariate Cox regression model predicting the time to TB diagnosis according to IGRA status.                                                                                                  | 20 |
| Table S11 | Time ratios from multivariate parametric Log Normal regression model predicting the time to TB diagnosis according to IGRA status                                                                                   | 21 |
| Table S12 | Hazard ratios from multivariate Cox regression model predicting the time to TB diagnosis according to treatment status                                                                                              | 22 |
| Table S13 | Time ratios from multivariate parametric Log Normal regression model predicting the time to TB diagnosis according to treatment status                                                                              | 23 |
| Table S14 | Hazard ratios from multivariate Cox regression model predicting the time to TB diagnosis according to treatment status in migrants with documented date of treatment completion derived from complete case analysis | 23 |
| Table S15 | Hazard ratios from multivariate Cox regression model predicting the time to TB diagnosis according to treatment status in migrants with documented date of treatment completion                                     | 24 |
| Table S16 | Hazard ratios from multivariate Cox regression model predicting the time to TB diagnosis according to treatment status                                                                                              | 25 |
| Table S17 | Hazard ratios from multivariate Cox regression model predicting the time to TB diagnosis according to treatment status                                                                                              | 26 |
| Table S18 | Hazard ratios from multivariate Cox regression model predicting the time to TB diagnosis according to treatment status                                                                                              | 27 |

|            |                                                                                                                        |    |
|------------|------------------------------------------------------------------------------------------------------------------------|----|
| Table S19  | Hazard ratios from multivariate Cox regression model predicting the time to TB diagnosis according to treatment status | 28 |
| Table S20  | Treatment regime and adverse reactions                                                                                 | 29 |
| References | List of references                                                                                                     | 29 |

5

6 **List of investigators:**

7 Luis C. Berrocal-Almanza, PhD

8 Ross J. Harris, PhD

9 Simon M. Collin, PhD

10 Morris C. Muzyamba, PhD

11 Olivia Conroy, MSc

12 Adil Mirza, MSc

13 Anne-Marie O'Connell, MSc

14 Lynn Altass, MSc

15 Sarah Anderson, MD

16 Lucy Thomas, MD

17 Colin Campbell, MD

18 Dominik Zenner, MD

19 Nick Phin, MD

20 Onn Min Kon, MD

21 E. Grace Smith, FRCPath

22 Ajit Lalvani DM,

23 **Methods**

24 **Author contributions**

25 Luis C. Berrocal-Almanza and Ajit Lalvani conceived and designed the study. The data was gathered, processed  
 26 and cleaned by Morris C. Muzyamba and Olivia Conroy. Adil Mirza, Anne-Marie O'Connell and Luis C.  
 27 Berrocal-Almanza did the record linkage. Luis C. Berrocal-Almanza, Ross J. Harris and Simon M. Collin analysed  
 28 the data. Luis C. Berrocal-Almanza wrote the first draft of the manuscript. All authors substantially contributed  
 29 to discussion of content and reviewed and edited the manuscript before submission. All authors were involved in

30 the decision and agreed to publish the paper. This research is sponsored by NIHR grant Health Protection Research  
31 Unit in Respiratory Infections.

## 32 **Evaluation design and participants**

33 In England, the LTBI testing and treatment programme is offered to migrants born in one of the 70 selected high  
34 incidence countries ( $\geq 150/100000$  or sub-Saharan Africa).<sup>1</sup> The number of evaluation participants according to  
35 country of origin and Enhanced Tuberculosis Surveillance system region is shown in supplementary table S1.<sup>2</sup>

## 37 **Data sources**

38 The evaluation cohort was created by probabilistic record linkage of three databases. The pre-entry screening for  
39 active TB database held at the UK Health Security Agency (UKHSA) records sociodemographic information  
40 including first and last name, and the date of pre-entry screening of all individuals from 101 countries who were  
41 screened for active TB as part of their visa application process; this database does not record date of UK entry or  
42 primary care registration; the National Health Service (NHS) Patient Registration Data System (PRDS) is held in  
43 a central repository by NHS digital,<sup>3</sup> it holds sociodemographic information of all patients registered in primary  
44 care in England and Wales including first and last name; this database does not provide date of primary care  
45 registration to the public, although this information can be retrieved for individuals born or who lived abroad  
46 using the special “flag4” code within the PRDS.<sup>4</sup> The Index of Multiple Deprivation 2015 is the official measure  
47 of relative deprivation for lower-layer super output areas, based on the 2011 census in England.<sup>5</sup> It ranks every  
48 small area in England from the most to least deprived. It uses deprivation deciles calculated by ranking the 32844  
49 small areas in England from the most to the least deprived and dividing them into 10 equal groups.<sup>5</sup> It is  
50 constructed by combining the following seven domains of deprivation: income, employment, education, skills and  
51 training, health and disability, crime, barriers to housing and services, and living environment.<sup>5</sup>

## 53 **Record linkage**

54 We used a validated probabilistic linkage method<sup>6</sup> to create a cohort of all foreign-born individuals that registered  
55 in primary care in England from January 1, 2011, to December 31, 2018 by linking three different datasets: the  
56 pre-entry active TB screening programme which holds records of all individuals from 101 high-burden countries  
57 ( $>40$  cases per 100000 population) who applied for visas for greater than six-months to enter the UK;<sup>7</sup> records  
58 extracted from the National Health Service (NHS) Patient Registration Data System, which holds information on  
59 all patients registered with primary care in England and Wales;<sup>3</sup> and the ‘Flag 4’ code within the NHS Patient  
60 Registration Data System which indicates that someone who has registered for the first time with an NHS general  
61 practitioner in England and Wales was born outside the UK, or if the individual’s previous address was outside  
62 the UK.<sup>4</sup> This cohort was first linked probabilistically to the database of the national LTBI programme to assess  
63 LTBI testing and treatment uptake, and later to the Enhanced Tuberculosis Surveillance system to identify  
64 subsequent development of any form of active TB in England, Wales, or Northern Ireland between January 1,  
65 2014, and November 30, 2019, without any restrictions on geographical location or country of birth. The variables  
66 used for probabilistic record linkage were first and last name, date of birth, sex and NHS number. A matching

67 threshold was calculated and one author (LCBA) performed a manual review of records with a matching score of  
68 10 above and below the matching threshold.

69

## 70 **Statistical analysis**

### 71 **Survival analysis**

72 For the survival analysis, univariate models were first fitted for each covariate, we then assessed effect interactions  
73 and modifications between the main outcomes and all covariates, after which, a multivariate model was fitted  
74 including all covariates and significant effect modifications. The proportionality of hazards assumption was  
75 assessed using Schoenfeld and scaled Schoenfeld residuals, and by including interactions of the predictors and  
76 time as time-variant covariates in the regression models. The best-fitting multivariate models, determined by a  
77 likelihood ratio test, were used to estimate adjusted survival functions. For the analysis stratified by time of follow-  
78 up, 6 months was used as the first time point because it had the lowest log likelihood compared to 7-12 months.

79

80 In a separate multivariate model, we explored area-level variation using a three-level mixed-effects parametric  
81 survival-time model with CCG and general practice level random intercepts; for this analysis, we assumed a Log  
82 Normal conditional distribution of the response given the random effects based on its lowest Akaike's information  
83 criterion when compared with Weibull and Log Logistic distributions.

84

85 We did sensitivity analyses to account for the imputation method using complete case analysis, and for treatment  
86 completion using only participants with confirmed date of treatment completion.

87

### 88 **Multiple imputation**

89 We used a multiple imputation by chained equations (MICE) model to impute missing values, while accounting  
90 for the uncertainty in missing information.<sup>8</sup> The creation and analysis of 5 imputed datasets is described in this  
91 section.

92

93 The country of origin for some individuals who had programmatic LTBI testing was not captured from the data  
94 returned to the UKHSA for programme monitoring and evaluation. These individuals were kept in the study  
95 because all other data was consistent with them having LTBI testing as part of the programme and their region of  
96 origin was imputed. The WHO estimated TB incidence in country of origin was imputed as a continuous variable  
97 using a truncated regression and transformed as categorical ordinal variable after imputation. The percentage of  
98 missing information and the models used to impute each variable is shown in supplementary table S2. All variables  
99 used in the estimation of main effects were part of the imputation model, including the effect modification of pre-  
100 entry screening and year of arrival in England or primary care registration. The predictor variables and the imputed  
101 variables were included in the model iteratively with 10 iterations per missing variable per imputation, the burn-  
102 in period was 10 and the seed set at 53421.

103

104 We initially performed a complete case analysis using Cox proportional-hazards models, followed by the creation  
105 and analysis of 5 imputations. The imputation model was assessed after estimation using the average relative  
106 variance increase (RVI), the largest fraction of missing information (FMI) and the Monte Carlo error (MCE)  
107 estimate. We used trace plots to assess model converge. The results of the complete case analysis did not differ  
108 from those of the data with multiple imputations.

109

## 110 **Results and sensitivity analysis**

### 111 **Effectiveness of the LTBI testing and treatment programme**

112 The complete case analysis of the multivariate Cox proportional-hazards models assessing the overall effect of  
113 LTBI testing and treatment on time to TB diagnosis is shown in (supplementary table S3). This model included  
114 LTBI testing and treatment as time-variant covariate and a significant effect modifications between pre-entry  
115 active TB screening and cohort year which estimates from the complete case analysis are shown in the  
116 multiplicative scale in (supplementary table S3) and in the additive scale in (supplementary table S4 and  
117 supplementary figure S1). The results of the complete case analysis were consistent with those of the analysis  
118 with the imputed dataset.

119

120 We performed a sensitivity analysis excluding TB cases diagnosed within 60 and 90 days of primary care  
121 registration or LTBI testing; 82 TB cases in the group without LTBI testing were diagnosed within 60 days of  
122 primary care registration and 66 TB cases in the group with LTBI testing were diagnosed within 60 days of LTBI  
123 testing. The unadjusted Kaplan Meier curves (supplementary figure S2 a and b) show that the early effect of  
124 increased risk of TB diagnosis in individuals who received an IGRA test persist even after excluding this TB  
125 cases. The curves also confirm that the increased risk disappears as time accrues because the curves converge,  
126 indicating that the hazard of TB diagnosis is not proportional i.e. the hazard ratio (HR) changes over time. The  
127 overall effectiveness of the LTBI testing and treatment programme was lower but still significantly associated  
128 with lower risk (hazard) of TB diagnosis (HR 0.82; 95% CI 0.69 - 0.99) and (HR 0.81; 95% CI 0.68 - 0.96) for  
129 60 and 90 days respectively (supplementary tables S5 and S6). The stratified analysis also confirmed that, even if  
130 the TB cases diagnosed within 60 and 90 days of primary care registration or LTBI testing are considered prevalent  
131 and excluded from the analysis, the intervention has an early effect being associated with higher risk of TB  
132 diagnosis during the first 6 months of follow-up (HR 11.14; 95% CI 8.11 - 15.3) and (HR 15.72; 95% CI 10.3 -  
133 23.9), after which time it is associated with a significantly lower risk (HR 0.55; 95% CI 0.38 - 0.77) and (HR  
134 0.56; 95% CI 0.39 - 0.79) for 60 and 90 days respectively (supplementary tables S5 and S6).

135

136 We explored the influence of area level variation using a three-level mixed-effects parametric survival-time model  
137 with CCG and general practice level random intercepts; for this analysis, we assumed a Log Normal conditional  
138 distribution of the response given the random effects. The results of these analysis shown in supplementary table  
139 5 demonstrate that all main effects remained significant despite a significant area level variation at the CCG and  
140 general practice level. The parametric model used is an accelerated failure time model, for this type of models the  
141 parameter estimates are interpreted as effects on the time scale, which can either accelerate or decelerate survival  
142 time. The effect measure used for this type of models is the Time Ratio (TR); if the TR is >1 it means that the  
143 factor accelerates survival time or leads to longer survival, in this case longer TB free survival; if the TR is <1 it

144 means the factor decelerates survival time or leads to shorter survival, shorter TB free survival. The overall effect  
145 of LTBI testing and treatment in this model only showed the association between the intervention and shorter TB  
146 free survival (TR 0.40 95%CI 0.31-0.52) this is because this model did not include the time-varying effect of the  
147 intervention. However, the stratified analysis by follow-up period showed that initially the intervention is  
148 associated with shorter TB free survival before six months of follow-up (TR 0.48 95%CI 0.42-0.56), after this  
149 time it is associated with longer TB free survival (TR 1.75 95%CI 1.15-2.67) supplementary table S7.

150

### 151 **Risk of progression to active tuberculosis in IGRA positive migrants**

152 The unadjusted Kaplan Meier curve in supplementary figure S3a indicated that IGRA- positive individuals who  
153 did not start LTBI preventative treatment have increased risk of developing TB than IGRA-negative individuals.  
154 This result did not vary when the presence of covariates was accounted for in the adjusted survival function shown  
155 in supplementary figure S3b.

156

157 The complete case analysis of the multivariate Cox proportional-hazards model assessing the risk of progression  
158 to active TB according to IGRA status is shown in supplementary table S8. The results of the complete case  
159 analysis were consistent with those of the analysis with the imputed dataset.

160

161 The association between IGRA status and risk of being diagnosed with TB was lower in the sensitivity analysis  
162 when TB cases diagnosed within 60 and 90 days of primary care registration or LTBI testing were excluded (HR  
163 18.6; 95% CI 11.6 - 29.9) and (HR 14.6; 95% CI 8.97 – 23.7) for 60 and 90 days respectively, supplementary  
164 tables S9 and S10.

165

166 We explored the influence of area level variation using a three-level mixed-effects parametric survival-time model  
167 with CCG and general practice level random intercepts; for this analysis, we assumed a Log Normal conditional  
168 distribution of the response given the random effects. The results of this analysis shown in supplementary table  
169 S11 demonstrate that all main effects remained significant despite a significant area level variation at the CCG  
170 level.

171

### 172 **Effectiveness of LTBI treatment**

173 The unadjusted Kaplan Meier curve shown in supplementary figure S4a indicated that IGRA-positive individuals  
174 who did not start LTBI preventative treatment have increased risk of developing TB than those who started  
175 treatment. This result did not vary when the presence of covariates was accounted for in the adjusted survival  
176 function supplementary figure S4b.

177

178 The complete case analysis of the multivariate Cox proportional-hazards model assessing the risk of progression  
179 to active TB according to LTBI treatment status in IGRA-positive individuals is shown in supplementary table  
180 S12. The results of the complete case analysis were consistent with those of the analysis with the imputed dataset  
181 in the direction of the association; both showed that IGRA-positive individuals who started LTBI treatment had



182 lower risk of developing active TB than individuals who did not start treatment. However, the effectiveness of  
183 LTBI treatment was higher in the complete case analysis (HR 0.12; 95% CI 0.03 to 0.41) than in the analysis  
184 with the imputed dataset (HR 0.14; 95% CI 0.06 to 0.32).

185

186 We explored the influence of area level variation using a three-level mixed-effects parametric survival-time model  
187 with CCG and general practice level random intercepts; for this analysis, we assumed a Log Normal conditional  
188 distribution of the response given the random effects. The results of this analysis shown in supplementary table  
189 S13 demonstrate that all main effects remained significant despite a significant area level variation at the CCG  
190 level.

191 Because not all IGRA-positive individuals who started LTBI treatment had a confirmed date of treatment  
192 completion, we performed a sensitivity analysis including only individuals with a confirmed date to treatment  
193 completion. These results were consistent with those of the complete case analysis and the analysis with the  
194 imputed dataset in the direction of the association, however the effectiveness was higher in the complete case (HR  
195 0.13; 95% CI 0.03 to 0.55) and imputed analysis (HR 0.08; 95% CI 0.02 to 0.26) respectively as shown in  
196 supplementary tables S14 and S15.

197

198 The effectiveness of treatment was lower in the sensitivity analysis when TB cases diagnosed within 60 and 90  
199 days of primary care registration or LTBI testing were excluded. We first performed the analysis using the  
200 complete dataset of cases without missing data, this analysis yielded effectiveness of 83% (HR 0.17; 95%CI 0.04-  
201 0.77) and 79% (HR 0.21; 95%CI 0.04-0.95) for 60 and 90 days respectively (tables supplementary tables S16  
202 and S17). The parameter estimates of this analysis were used to derive the adjusted numbers needed to treat, these  
203 were 33.7 (95%CI 19-48.4) and 34.8 (95%CI 19.8-49.8) for 60 and 90 days respectively (tables supplementary  
204 tables S16 and S17). Next, we carried out the analysis with the dataset in which all missing values were imputed,  
205 the effectiveness of treatment of 77% (HR 0.23; 95% CI 0.09 - 0.57) and 75% (HR 0.25; 95% CI 0.09 – 0.67)  
206 for 60 and 90 days respectively supplementary tables S18 and S19. Thus, although there was variation in treatment  
207 effectiveness when these cases were excluded, it did not affect much the adjusted number needed to treat. The  
208 reason for this is that the latter value was derived using the parameter estimates of the complete case analysis  
209 which results did not varied much from the complete cases analysis when all TB cases were included in the  
210 primary analysis. The information on treatment regime, adverse reactions overall and adverse reactions according  
211 to treatment regime is shown in supplementary table S20.

212

213

214

215 **Supplementary figures and tables**

216

217 **Supplementary figure 1: Marginal effects of effect modification.** Plot of marginal effects shown in  
 218 supplementary table 4 for the effect modification included in the multivariate model 1 of the complete case  
 219 analysis shown in supplementary table 3. The predictive margins of pre-entry screening by year of arrival in  
 220 England or primary care registration are shown with and without confidence intervals in A and B respectively.

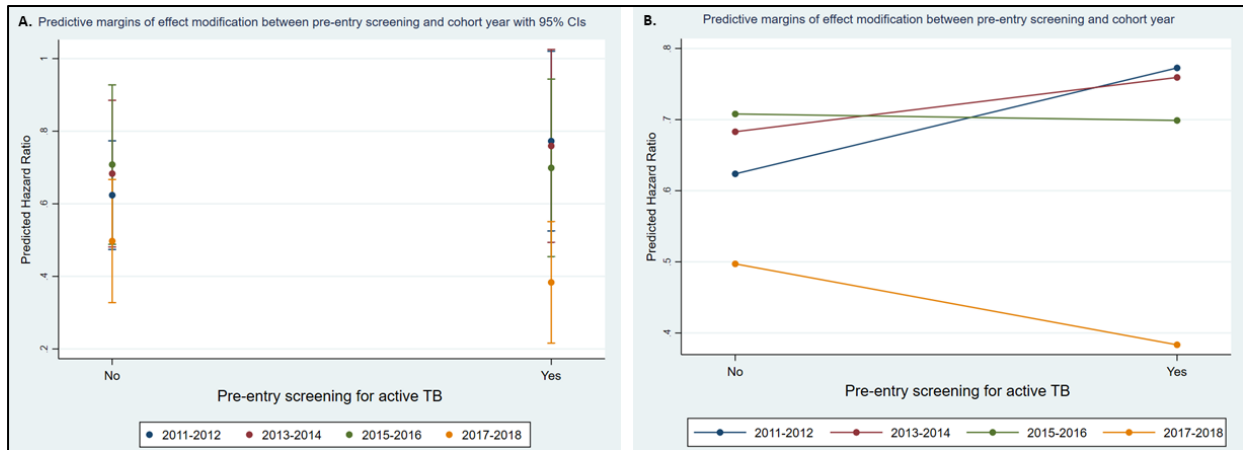

221

222

223 **Supplementary figure 2. Unadjusted Kaplan Meier curve comparing TB-free survival between migrants**  
 224 **tested and not tested for LTBI.** TB-free survival is on the vertical axis and time since starting follow-up is on  
 225 the horizontal axis. The curve was derived using all study participants excluding those who developed TB within  
 226 60 (a) and 90 (b) days of primary care registration or LTBI testing TB and those diagnosed 21 days after starting  
 227 treatment n=367928 in (a) and 367870 in (b). The inset shows the same data on an enlarged y axis.

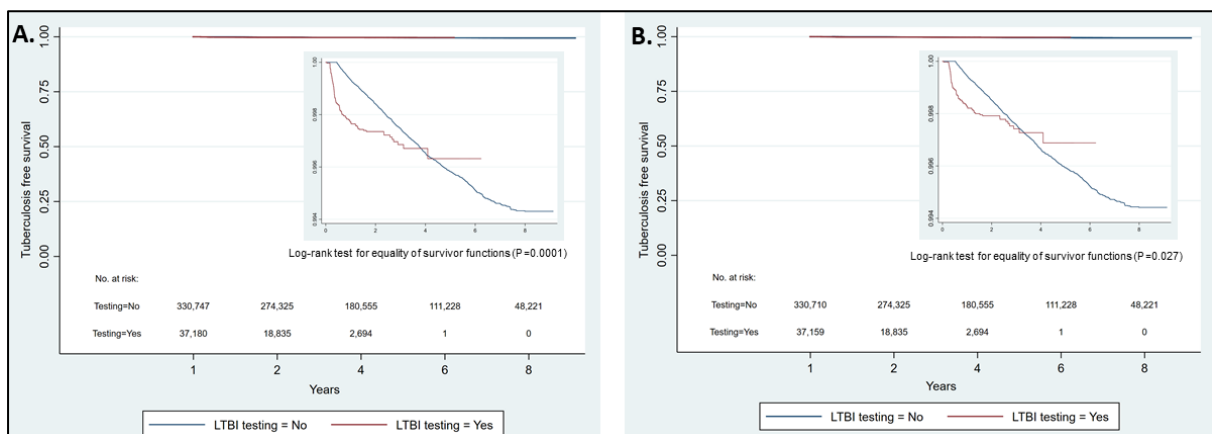

228

229

230

231

232

233

234 **Supplementary figure 3: Survival functions for risk of progression according to IGRA status.** Unadjusted (A) and adjusted (B) survival functions comparing TB-free survival between IGRA-positive and IGRA-negative individuals that did not start treatment. TB-free survival is on the vertical axis and time since starting follow-up is on the horizontal axis. The adjusted survival function depicted in B was derived after fitting a parametric regression model including all variables shown in supplementary table 6 setting each covariate to its mean value. n= 36510 in A and n=19968 in B.

240

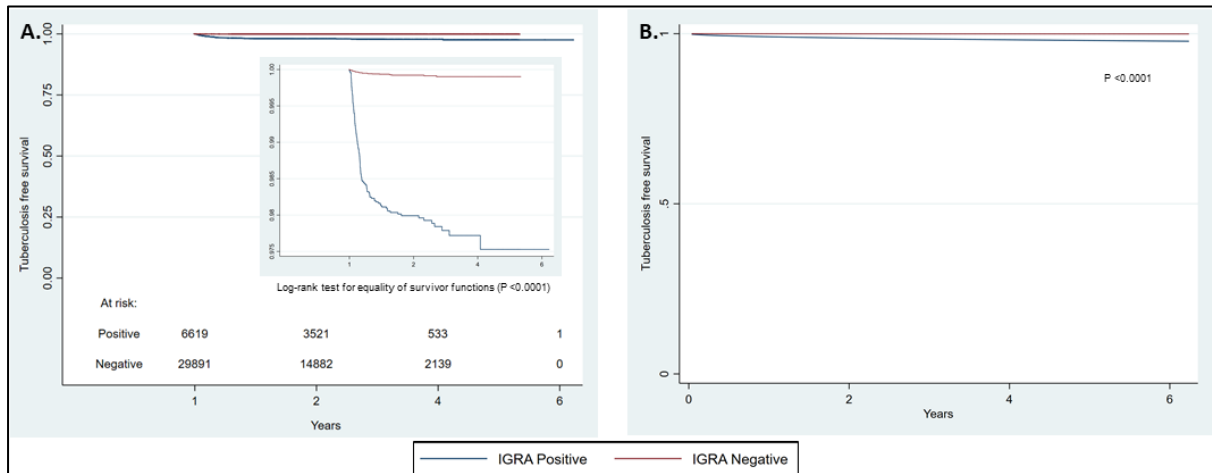

241

242

243 **Supplementary figure 4: Survival functions for risk of progression according to treatment status.** Unadjusted (A) and adjusted (B) survival functions comparing TB-free survival between IGRA-positive individuals who did and did not start treatment. TB-free survival is on the vertical axis and time since starting follow-up is on the horizontal axis. The adjusted survival function depicted in B was derived after fitting a parametric regression model including all variables shown in supplementary table 8 setting each covariate to its mean value. n= 6619 in A and n=3804 in B.

249

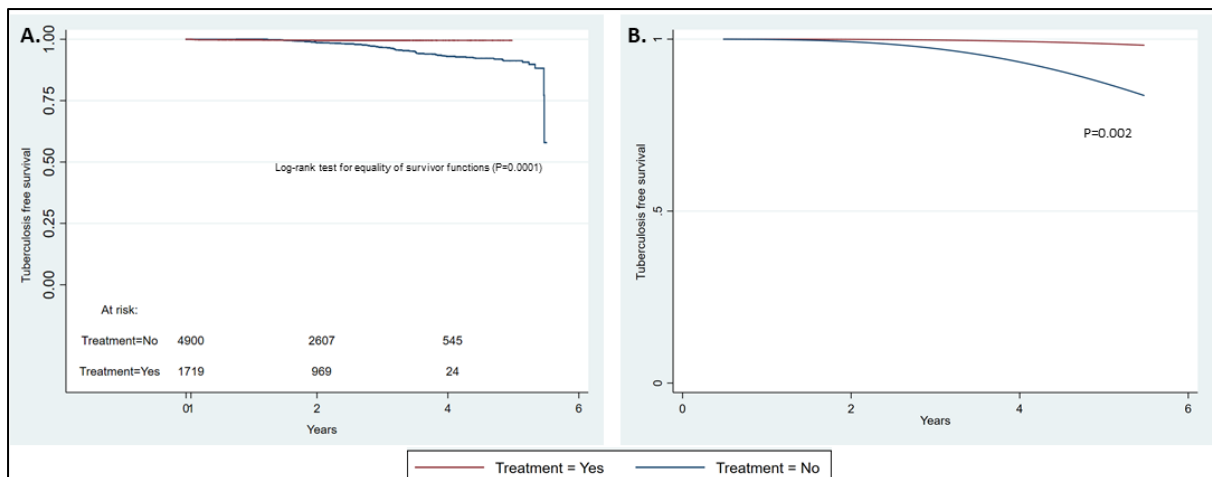

250

251

252

253

254

255

| Country of origin                | WHO tuberculosis incidence (cases per 100000) | All participants (n= 368097) | Intervention Group (n=37268) | Control group (n=330829) |
|----------------------------------|-----------------------------------------------|------------------------------|------------------------------|--------------------------|
| <b>Africa</b>                    |                                               |                              |                              |                          |
| Angola                           | 150-349                                       | 1534                         | 30                           | 1504                     |
| Benin                            | 40-149                                        | 222                          | 5                            | 217                      |
| Botswana                         | >350                                          | 417                          | 14                           | 403                      |
| Burkina Faso                     | 40-149                                        | 65                           | 3                            | 62                       |
| Burundi                          | 150-349                                       | 177                          | 5                            | 172                      |
| Cape Verde                       | 150-349                                       | 415                          | 11                           | 404                      |
| Cameroon                         | 150-349                                       | 2213                         | 67                           | 2146                     |
| Central African Republic         | >350                                          | 11                           | 1                            | 10                       |
| Chad                             | 150-349                                       | 56                           | 3                            | 53                       |
| Comoros Islands                  | 40-149                                        | 10                           | 0                            | 10                       |
| Congo                            | >350                                          | 1383                         | 51                           | 1332                     |
| Democratic Republic of Congo     | >350                                          | 367                          | 42                           | 325                      |
| Djibouti                         | >350                                          | 59                           | 3                            | 56                       |
| Equatorial Guinea                | 150-349                                       | 156                          | 6                            | 150                      |
| Eritrea                          | 40-149                                        | 7054                         | 603                          | 6451                     |
| Ethiopia                         | 150-349                                       | 2548                         | 160                          | 2388                     |
| Gabon                            | >350                                          | 84                           | 1                            | 83                       |
| Gambia                           | 150-349                                       | 1402                         | 91                           | 1311                     |
| Ghana                            | 40-149                                        | 13073                        | 581                          | 12492                    |
| Guinea                           | 150-349                                       | 613                          | 25                           | 588                      |
| Guinea-Bissau                    | >350                                          | 1199                         | 67                           | 1132                     |
| Ivory Coast                      | 150-349                                       | 866                          | 13                           | 853                      |
| Kenya                            | 150-349                                       | 3142                         | 140                          | 3002                     |
| Lesotho                          | >350                                          | 21                           | 2                            | 19                       |
| Liberia                          | 150-349                                       | 188                          | 6                            | 182                      |
| Madagascar                       | 150-349                                       | 127                          | 1                            | 126                      |
| Malawi                           | 150-349                                       | 295                          | 15                           | 280                      |
| Mali                             | 40-149                                        | 2161                         | 64                           | 2097                     |
| Mauritania                       | 150-349                                       | 54                           | 1                            | 53                       |
| Mauritius                        | 40-149                                        | 1982                         | 35                           | 1947                     |
| Mozambique                       | >350                                          | 262                          | 11                           | 251                      |
| Namibia                          | >350                                          | 275                          | 13                           | 262                      |
| Niger                            | 150-349                                       | 36                           | 2                            | 34                       |
| Nigeria                          | 150-349                                       | 21322                        | 959                          | 20363                    |
| Rwanda                           | 40-149                                        | 287                          | 6                            | 281                      |
| Sao Tome and Principe            | 40-149                                        | 413                          | 15                           | 398                      |
| Senegal                          | 150-349                                       | 765                          | 32                           | 733                      |
| Seychelles                       | 40-149                                        | 131                          | 0                            | 131                      |
| Sierra Leone                     | 150-349                                       | 1281                         | 35                           | 1246                     |
| Somalia                          | 150-349                                       | 4419                         | 262                          | 4157                     |
| South Africa                     | >350                                          | 12311                        | 208                          | 12103                    |
| Sudan                            | 150-349                                       | 5511                         | 434                          | 5077                     |
| Eswatini                         | 150-349                                       | 67                           | 4                            | 63                       |
| Tanzania                         | 150-349                                       | 1029                         | 36                           | 993                      |
| Togo                             | 40-149                                        | 133                          | 3                            | 130                      |
| Uganda                           | 150-349                                       | 1666                         | 94                           | 1572                     |
| Zambia                           | >350                                          | 460                          | 22                           | 438                      |
| Zimbabwe                         | >350                                          | 2703                         | 117                          | 2586                     |
| <b>Americas</b>                  |                                               |                              |                              |                          |
| Haiti                            | 150-349                                       | 78                           | 1                            | 77                       |
| <b>Europe</b>                    |                                               |                              |                              |                          |
| Moldova                          | 150-349                                       | 10,381                       | 305                          | 9996                     |
| <b>East and South East Asia</b>  |                                               |                              |                              |                          |
| Cambodia                         | >350                                          | 246                          | 8                            | 238                      |
| East Timor                       | >350                                          | 566                          | 29                           | 537                      |
| Indonesia                        | 150-349                                       | 4361                         | 129                          | 4232                     |
| Kiribati                         | >350                                          | 1                            | 0                            | 1                        |
| North Korea                      | >350                                          | 7                            | 0                            | 7                        |
| South Korea                      | 150-349                                       | 4738                         | 7                            | 4731                     |
| Lao People's Democratic Republic | 150-349                                       | 98                           | 6                            | 93                       |
| Marshall Islands                 | >350                                          | 2                            | 0                            | 2                        |

|                   |         |         |      |        |
|-------------------|---------|---------|------|--------|
| Mongolia          | 150-349 | 615     | 17   | 598    |
| Myanmar           | >350    | 998     | 49   | 949    |
| Papua New Guinea  | 150-349 | 45      | 0    | 45     |
| Philippines       | 150-349 | 8114    | 221  | 7893   |
| Thailand          | 150-349 | 6595    | 135  | 6460   |
| Tuvalu            | 150-349 | 2       | 0    | 2      |
| Viet Nam          | 150-349 | 5       | 5    | 0      |
| <b>South Asia</b> |         |         |      |        |
| Afghanistan       | 150-349 | 6998    | 790  | 6208   |
| Bangladesh        | 150-349 | 22909   | 2506 | 20403  |
| Bhutan            | 150-349 | 57      | 3    | 54     |
| India             | 150-349 | 121,564 | 8302 | 113262 |
| Nepal             | 150-349 | 5619    | 422  | 5197   |
| Pakistan          | 150-349 | 64,404  | 4302 | 60,102 |
| Sri Lanka         | 150-349 | 7       | 7    | 0      |

258

259 **Supplementary table S2. Percentage of missing information, variables and models used for multiple**  
260 **imputation.**

261

| Variable                                                | Observed n (%) | Missing n (%) | Model                                     |
|---------------------------------------------------------|----------------|---------------|-------------------------------------------|
| Age group                                               | 367880 (99.94) | 217 (0.06)    | Logistic regression                       |
| Sex                                                     | 367402 (99.81) | 695 (0.19)    | Logistic regression                       |
| ETS region of origin                                    | 353388 (96.01) | 14709 (3.99)  | Augmented multinomial logistic regression |
| WHO estimated TB incidence in country of origin         | 353388 (96.01) | 14709 (3.99)  | Truncated regression                      |
| UKHSA estimated TB incidence in CCG area of residence   | 352881 (95.87) | 15216 (4.13)  | Ordered logistic regression               |
| Deprivation index                                       | 359713 (97.73) | 8384 (2.27)   | Ordered logistic regression               |
| Year of arrival in England or primary care registration | 353388 (96.01) | 14709 (3.99)  | Augmented ordered logistic regression     |

262

263 **Supplementary table S3. Hazard ratios from univariate and multivariate Cox regression models predicting**  
264 **the time to TB diagnosis.** ‡ Effect modification is shown in the multiplicative scale using pre-entry active TB  
265 screening (yes) as the baseline group n=332579. ¶ Models 2-6 include the same covariates as model 1 and the  
266 time-variant effect of LTBI testing and treatment. # Rate per one person-year (95%CI). ETS: Enhanced  
267 Tuberculosis Surveillance system, CCG: Clinical Commissioning Group, LTBI: Latent TB infection.

268

| Characteristic                                                                | No. of events/<br>Person-years of Follow-up | Rate per 100000<br>Person-years (95%CI) | Hazard ratio (95% CI) | P value |
|-------------------------------------------------------------------------------|---------------------------------------------|-----------------------------------------|-----------------------|---------|
| Model 1                                                                       |                                             |                                         |                       |         |
| Age group — no. (%)                                                           |                                             |                                         |                       |         |
| 16 – 25 years                                                                 | 763/946151                                  | 80 (75-86)                              | 0.89 (0.80-1.00)      | 0.056   |
| 26 – 35 years                                                                 | 644/691631                                  | 93 (86-100)                             | 1.00                  |         |
| Sex — no. (%)                                                                 |                                             |                                         |                       |         |
| Female                                                                        | 791/829162                                  | 95 (88-102)                             | 1.00                  |         |
| Male                                                                          | 619/807301                                  | 76 (70-82)                              | 0.79 (0.71-0.88)      | <0.0001 |
| ETS region of origin — no. (%)                                                |                                             |                                         |                       |         |
| Africa                                                                        | 377/423383                                  | 89 (80-98)                              | 1.00                  |         |
| Americas, Europe                                                              | 0/30893                                     | 0                                       | 0                     |         |
| East and South East Asia                                                      | 50/98843                                    | 50 (38-66)                              | 0.61 (0.44-0.85)      | 0.004   |
| South Asia                                                                    | 912/1051897                                 | 86 (81-92)                              | 1.12 (0.94-1.34)      | 0.017   |
| WHO estimated TB incidence in country of origin (cases per 100 000) — no. (%) |                                             |                                         |                       |         |
| 40-149                                                                        | 187/196673                                  | 95 (82-109)                             | 1.00                  |         |
| 150-349                                                                       | 1082/1297870                                | 83 (78-88)                              | 0.68 (0.55-0.85)      | 0.001   |
| >350                                                                          | 70/110474                                   | 63 (50-80)                              | 0.70 (0.52-0.93)      | 0.017   |

|                                                                                                                     |              |                   |                  |        |
|---------------------------------------------------------------------------------------------------------------------|--------------|-------------------|------------------|--------|
| UKHSA estimated TB incidence in CCG area of residence (cases per 100 000) — no. (%)                                 |              |                   |                  |        |
| ≤ 9·2                                                                                                               | 119/146624   | 81 (67-97)        | 1·00             |        |
| 9·3-31·6                                                                                                            | 842/970862   | 86 (81-92)        | 1·04 (0·85-1·27) | 0·686  |
| > 31·6                                                                                                              | 408/460358   | 88 (80-97)        | 1·10 (0·88-1·37) | 0·379  |
| Deprivation index — no. (%)                                                                                         |              |                   |                  |        |
| 1–3 deciles (most deprived)                                                                                         | 769/821580   | 93 (87-100)       | 1·00             |        |
| 4–6 deciles                                                                                                         | 482/583210   | 82 (75-90)        | 0·92 (0·81-1·03) | 0·181  |
| 7–10 deciles (least deprived)                                                                                       | 122/196726   | 62 (51-74)        | 0·71 (0·58-0·86) | 0·001  |
| Year of arrival in England or primary care registration — no. (%)                                                   |              |                   |                  |        |
| 2011-2012                                                                                                           | 475/629979   | 75 (68-82)        | 1·00             |        |
| 2013-2014                                                                                                           | 335/368239   | 90 (81-101)       | 1·11 (0·94-1·31) | 0·206  |
| 2015-2016                                                                                                           | 368/362067   | 101 (91-112)      | 1·13 (0·95-1·34) | 0·058  |
| 2017-2018                                                                                                           | 161/244731   | 65 (56-76)        | 0·89 (0·72-1·10) | 0·294  |
| Pre-entry active TB screening                                                                                       |              |                   |                  |        |
| Yes                                                                                                                 | 328/374038   | 87 (78-97)        | 1·24 (1·00-1·54) | 0·048  |
| No                                                                                                                  | 1084/1264195 | 85 (80-91)        | 1·00             |        |
| Effect modification: pre-entry screening (Yes)/year of arrival in England or primary care registration <sup>‡</sup> |              |                   |                  |        |
| 2011-2012                                                                                                           |              |                   | 1·00             |        |
| 2013-2014                                                                                                           |              |                   | 0·97 (0·72-1·31) | 0·892  |
| 2015-2016                                                                                                           |              |                   | 0·89 (0·66-1·19) | 0·459  |
| 2017-2018                                                                                                           |              |                   | 0·47 (0·32-0·70) | <0·001 |
| Time-variant LTBI testing and treatment                                                                             |              |                   |                  |        |
| Yes                                                                                                                 | 165/81002    | 203 (174-237)     | 0·78 (0·61-1·00) | 0·057  |
| No                                                                                                                  | 1247/1557230 | 80 (75-84)        | 1·00             |        |
| LTBI testing and treatment by follow-up period                                                                      |              |                   |                  |        |
| Model 2 <sup>¶</sup> < 6 months                                                                                     |              |                   | 7·93 (5·71-11·0) | <0·001 |
| Yes                                                                                                                 | 124/26·6     | #4·65 (3·90-5·54) |                  |        |
| No                                                                                                                  | 110/42·3     | #2·59 (2·15-3·13) |                  |        |
| Model 3 > 6 months                                                                                                  |              |                   | 0·56 (0·36-0·88) | 0·013  |
| Yes                                                                                                                 | 42/80969     | 51·8 (38·3-70·1)  |                  |        |
| No                                                                                                                  | 1170/1557198 | 75·1 (70·9-79·5)  |                  |        |
| Model 4 1 year                                                                                                      |              |                   | 0·38 (0·19-0·74) | 0·004  |
| Yes                                                                                                                 | 18/76490     | 23·5 (14·8-37·3)  |                  |        |
| No                                                                                                                  | 977/1555582  | 62·8 (58·9-66·8)  |                  |        |
| Model 5 2 years                                                                                                     |              |                   | 0·48 (0·20-1·17) | 0·108  |
| Yes                                                                                                                 | 8/57548      | 13·9 (6·95-27·8)  |                  |        |
| No                                                                                                                  | 698/1474486  | 47·3 (43·9-50·9)  |                  |        |
| Model 6 3 years                                                                                                     |              |                   | 0·32 (0·04-2·30) | 0·259  |
| Yes                                                                                                                 | 2/30296      | 6·6 (1·65-26·4)   |                  |        |
| No                                                                                                                  | 464/1352527  | 34·3 (31·3-37·5)  |                  |        |

269

270

271

272

273

274 **Supplementary table S4: Predicted marginal effects of the effect modification between pre-entry active TB**  
 275 **screening and year of arrival in England or primary care registration.** As included in the main effect  
 276 multivariate model 1 of the complete case analysis shown in supplementary table 3.

277

| Characteristic                                                                           | Predicted hazard ratio (95% CI) | P value |
|------------------------------------------------------------------------------------------|---------------------------------|---------|
| Pre-entry active TB screening by year of arrival in England or primary care registration |                                 |         |
| Pre-entry No# Cohort year 2011-2012                                                      | 0.61 (0.47-0.76)                | <0.0001 |
| Pre-entry No# Cohort year 2013-2014                                                      | 0.68 (0.48-0.88)                | <0.0001 |
| Pre-entry No# Cohort year 2015-2016                                                      | 0.72 (0.50-0.95)                | <0.0001 |
| Pre-entry No# Cohort year 2017-2018                                                      | 0.55 (0.36-0.73)                | <0.0001 |
| Pre-entry Yes# Cohort year 2011-2012                                                     | 0.76 (0.52-1.01)                | <0.0001 |
| Pre-entry Yes# Cohort year 2013-2014                                                     | 0.75 (0.49-1.01)                | <0.0001 |
| Pre-entry Yes# Cohort year 2015-2016                                                     | 0.68 (0.44-0.92)                | <0.0001 |
| Pre-entry Yes# Cohort year 2017-2018                                                     | 0.36 (0.20-0.52)                | <0.0001 |

278

279 **Supplementary table S5. Hazard ratios from multivariate Cox regression model predicting the time to TB**  
 280 **diagnosis.** \* The number of events include only participants with no missing information for that characteristic. §  
 281 The hazard ratio, 95% CI and p value estimates were derived from the total cohort of migrants, excluding those  
 282 who developed TB within 60 days of primary care registration or LTBI testing and 21 days after starting treatment  
 283 n= 367948, after imputing the missing values using a multiple imputation by chained equations model. \* Effect  
 284 modification is shown in the multiplicative scale using pre-entry active TB screening (yes) as the baseline group.  
 285 ¶ Models 2-6 include the same covariates as model 1 and the time-variant effect of LTBI testing and treatment. #  
 286 Rate per one person-year (95%CI), ETS: Enhanced Tuberculosis Surveillance system, CCG: Clinical  
 287 Commissioning Group, LTBI: Latent TB infection.

288

| Characteristic                                                                | No. of events/ Person-years of Follow-up* | Rate per 100000 Person-years (95%CI) | Hazard ratio (95% CI) § | P value |
|-------------------------------------------------------------------------------|-------------------------------------------|--------------------------------------|-------------------------|---------|
| Model 1                                                                       |                                           |                                      |                         |         |
| Age group — no. (%)                                                           |                                           |                                      |                         |         |
| 16 – 25 years                                                                 | 715/946137                                | 75 (70-81)                           | 0.86 (0.77-0.96)        | 0.010   |
| 26 – 35 years                                                                 | 583/691616                                | 84 (77-91)                           | 1.00                    |         |
| Sex — no. (%)                                                                 |                                           |                                      |                         |         |
| Female                                                                        | 731/829144                                | 88 (82-94)                           | 1.00                    |         |
| Male                                                                          | 568/807288                                | 70 (64-76)                           | 0.81 (0.73-0.90)        | <0.0001 |
| ETS region of origin — no. (%)                                                |                                           |                                      |                         |         |
| Africa                                                                        | 349/423375                                | 82 (74-91)                           | 1.00                    |         |
| Americas, Europe                                                              | 0/30893                                   | 0                                    | 0                       |         |
| East and South East Asia                                                      | 46/98842                                  | 46 (34-62)                           | 0.67 (0.49-0.92)        | 0.014   |
| South Asia                                                                    | 857/1051881                               | 81 (76-87)                           | 1.18 (0.96-1.44)        | 0.105   |
| WHO estimated TB incidence in country of origin (cases per 100 000) — no. (%) |                                           |                                      |                         |         |
| 40-149                                                                        | 174/196668                                | 88 (76-102)                          | 1.00                    |         |
| 150-349                                                                       | 1015/1297852                              | 78 (73-83)                           | 0.63 (0.49-0.81)        | 0.001   |
| >350                                                                          | 63/110472                                 | 57 (44-73)                           | 0.62 (0.46-0.83)        | 0.002   |
| UKHSA estimated TB incidence in CCG area                                      |                                           |                                      |                         |         |

|                                                                                                                     |              |                   |                   |         |
|---------------------------------------------------------------------------------------------------------------------|--------------|-------------------|-------------------|---------|
| of residence (cases per 100 000) — no. (%)                                                                          |              |                   |                   |         |
| ≤ 9·2                                                                                                               | 105/146619   | 71 (59-86)        | 1·00              |         |
| 9·3-31·6                                                                                                            | 782/970844   | 80 (75-86)        | 1·03 (0·83-1·28)  | 0·762   |
| > 31·6                                                                                                              | 376/460350   | 81 (73-90)        | 1·07 (0·85-1·35)  | 0·549   |
| Deprivation index — no. (%)                                                                                         |              |                   |                   |         |
| 1-3 deciles (most deprived)                                                                                         | 711/821566   | 86 (80-93)        | 1·00              |         |
| 4-6 deciles                                                                                                         | 442/583200   | 75 (69-83)        | 0·89 (0·79-1·01)  | 0·083   |
| 7-10 deciles (least deprived)                                                                                       | 117/196724   | 59 (49-71)        | 0·73 (0·59-0·90)  | 0·004   |
| Year of arrival in England or primary care registration — no. (%)                                                   |              |                   |                   |         |
| 2011-2012                                                                                                           | 470/629978   | 74 (68-81)        | 1·00              |         |
| 2013-2014                                                                                                           | 322/368235   | 87 (78-97)        | 1·14 (0·97-1·34)  | 0·097   |
| 2015-2016                                                                                                           | 324/362054   | 89 (80-99)        | 1·07 (0·90-1·27)  | 0·426   |
| 2017-2018                                                                                                           | 136/244724   | 55 (46-65)        | 0·64 (0·51-0·81)  | <0·0001 |
| Pre-entry active TB screening                                                                                       |              |                   |                   |         |
| Yes                                                                                                                 | 305/374032   | 81 (72-91)        | 1·26 (1·02-1·55)  | 0·030   |
| No                                                                                                                  | 995/1264170  | 78 (73-83)        | 1·00              |         |
| Effect modification: pre-entry screening (Yes)/year of arrival in England or primary care registration <sup>‡</sup> |              |                   |                   |         |
| 2011-2012                                                                                                           |              |                   | 1·00              |         |
| 2013-2014                                                                                                           |              |                   | 0·93 (0·69-1·24)  | 0·629   |
| 2015-2016                                                                                                           |              |                   | 0·82 (0·62-1·10)  | 0·199   |
| 2017-2018                                                                                                           |              |                   | 0·43 (0·28-0·63)  | <0·0001 |
| Time-variant LTBI testing and treatment                                                                             |              |                   |                   |         |
| Yes                                                                                                                 | 102/80990    | 125 (103-152)     | 0·82 (0·69-0·97)  | 0·023   |
| No                                                                                                                  | 1198/1557211 | 76 (72-81)        | 1·00              |         |
| LTBI testing and treatment by follow-up period                                                                      |              |                   |                   |         |
| Model 2 <sup>¶</sup> < 6 months                                                                                     |              |                   |                   |         |
| Yes                                                                                                                 | 69/29·7      | #2·31 (1·83-2·93) | 11·14 (8·11-15·3) | <0·0001 |
| No                                                                                                                  | 72/37·3      | #1·92 (1·53-2·43) | 1·00              |         |
| Model 3 > 6 months                                                                                                  |              |                   |                   |         |
| Yes                                                                                                                 | 33/80961     | 40·7 (28·9-57·3)  | 0·55 (0·38-0·77)  | 0·001   |
| No                                                                                                                  | 1126/1557174 | 72·3 (68·2-76·6)  | 1·00              |         |
| Model 4 1 year                                                                                                      |              |                   |                   |         |
| Yes                                                                                                                 | 18/76490     | 23·5 (14·8-37·3)  | 0·42 (0·27-0·66)  | <0·0001 |
| No                                                                                                                  | 977/1555582  | 62·8 (58·9-66·8)  | 1·00              |         |
| Model 5 2 years                                                                                                     |              |                   |                   |         |
| Yes                                                                                                                 | 8/57548      | 13·9 (6·95-27·8)  | 0·43 (0·22-0·84)  | 0·014   |
| No                                                                                                                  | 698/1474486  | 47·3 (43·9-50·9)  | 1·00              |         |
| Model 6 3 years                                                                                                     |              |                   |                   |         |
| Yes                                                                                                                 | 2/30296      | 6·60 (1·65-26·4)  | 0·31 (0·07-1·25)  | 0·100   |
| No                                                                                                                  | 464/1352527  | 34·3 (31·3-37·5)  | 1·00              |         |

289

290

291

292

293

294



295 **Supplementary table S6. Hazard ratios from multivariate Cox regression model predicting the time to TB**  
 296 **diagnosis.** \* The number of events include only participants with no missing information for that characteristic. §  
 297 The hazard ratio, 95% CI and p value estimates were derived from the total cohort of migrants, excluding those  
 298 who developed TB within 90 days of primary care registration or LTBI testing and 21 days after starting treatment  
 299 n= 367883, after imputing the missing values using a multiple imputation by chained equations model. \* Effect  
 300 modification is shown in the multiplicative scale using pre-entry active TB screening (yes) as the baseline group.  
 301 ¶ Models 2-6 include the same covariates as model 1 and the time-variant effect of LTBI testing and treatment. #  
 302 Rate per one person-year (95%CI), ETS: Enhanced Tuberculosis Surveillance system, CCG: Clinical  
 303 Commissioning Group, LTBI: Latent TB infection.

304

| Characteristic                                                                                                      | No. of events/<br>Person-years of Follow-up* | Rate per 100000<br>Person-years (95%CI) | Hazard ratio (95%<br>CI) § | P value |
|---------------------------------------------------------------------------------------------------------------------|----------------------------------------------|-----------------------------------------|----------------------------|---------|
| Model 1                                                                                                             |                                              |                                         |                            |         |
| Age group — no. (%)                                                                                                 |                                              |                                         |                            |         |
| 16 – 25 years                                                                                                       | 695/946130                                   | 73 (68-79)                              | 0.88 (0.79-0.99)           | 0.039   |
| 26 – 35 years                                                                                                       | 546/691601                                   | 78 (72-85)                              | 1.00                       |         |
| Sex — no. (%)                                                                                                       |                                              |                                         |                            |         |
| Female                                                                                                              | 698/829132                                   | 84 (78-90)                              | 1.00                       |         |
| Male                                                                                                                | 543/807278                                   | 67 (61-73)                              | 0.81 (0.72-0.91)           | <0.0001 |
| ETS region of origin —<br>no. (%)                                                                                   |                                              |                                         |                            |         |
| Africa                                                                                                              | 331/423368                                   | 78 (70-87)                              | 1.00                       |         |
| Americas,<br>Europe                                                                                                 | 0/30893                                      | 0                                       | 0                          |         |
| East and South East<br>Asia                                                                                         | 44/98841                                     | 44 (33-59)                              | 0.69 (0.50-0.96)           | 0.029   |
| South Asia                                                                                                          | 831/1051870                                  | 79 (73-84)                              | 1.20 (0.97-1.48)           | 0.080   |
| WHO estimated TB<br>incidence in country of<br>origin (cases per 100<br>000) — no. (%)                              |                                              |                                         |                            |         |
| 40-149                                                                                                              | 165/196665                                   | 83 (72-97)                              | 1.00                       |         |
| 150-349                                                                                                             | 981/1297837                                  | 75 (71-80)                              | 0.63 (0.48-0.83)           | 0.002   |
| >350                                                                                                                | 60/110470                                    | 60 (42-69)                              | 0.61 (0.44-0.84)           | 0.003   |
| UKHSA estimated TB<br>incidence in CCG area<br>of residence (cases per<br>100 000) — no. (%)                        |                                              |                                         |                            |         |
| ≤ 9.2                                                                                                               | 102/146618                                   | 69 (57-84)                              | 1.00                       |         |
| 9.3-31.6                                                                                                            | 744/970828                                   | 76 (71-82)                              | 1.02 (0.82-1.27)           | 0.822   |
| > 31.6                                                                                                              | 362/460345                                   | 78 (70-87)                              | 1.07 (0.84-1.36)           | 0.573   |
| Deprivation index —<br>no. (%)                                                                                      |                                              |                                         |                            |         |
| 1–3 deciles (most<br>deprived)                                                                                      | 682/821555                                   | 83 (77-89)                              | 1.00                       |         |
| 4–6 deciles                                                                                                         | 421/583191                                   | 72 (65-79)                              | 0.89 (0.78-1.01)           | 0.084   |
| 7–10 deciles (least<br>deprived)                                                                                    | 112/196722                                   | 56 (47-68)                              | 0.74 (0.59-0.91)           | 0.006   |
| Year of arrival in<br>England or primary care<br>registration — no. (%)                                             |                                              |                                         |                            |         |
| 2011-2012                                                                                                           | 468/629978                                   | 74 (67-81)                              | 1.00                       |         |
| 2013-2014                                                                                                           | 315/368232                                   | 85 (76-95)                              | 1.11 (0.94-1.31)           | 0.186   |
| 2015-2016                                                                                                           | 300/362043                                   | 82 (74-92)                              | 0.96 (0.80-1.15)           | 0.709   |
| 2017-2018                                                                                                           | 123/244718                                   | 50 (42-59)                              | 0.60 (0.47-0.76)           | <0.0001 |
| Pre-entry active TB<br>screening                                                                                    |                                              |                                         |                            |         |
| Yes                                                                                                                 | 302/374031                                   | 80 (72-90)                              | 1.26 (1.02-1.55)           | 0.029   |
| No                                                                                                                  | 940/1264148                                  | 74 (69-79)                              | 1.00                       |         |
| Effect modification:<br>pre-entry screening<br>(Yes)/year of arrival in<br>England or primary care<br>registration* |                                              |                                         |                            |         |
| 2011-2012                                                                                                           |                                              |                                         | 1.00                       |         |
| 2013-2014                                                                                                           |                                              |                                         | 0.92 (0.69-1.24)           | 0.604   |
| 2015-2016                                                                                                           |                                              |                                         | 0.82 (0.61-1.10)           | 0.193   |

|                                                |              |                   |                   |         |
|------------------------------------------------|--------------|-------------------|-------------------|---------|
| 2017-2018                                      |              |                   | 0.43 (0.28-0.65)  | <0.0001 |
| Time-variant LTBI testing and treatment        |              |                   |                   |         |
| Yes                                            | 81/80986     | 100 (80-124)      | 0.81 (0.68-0.96)  | 0.018   |
| No                                             | 1161/1557194 | 74 (70-78)        | 1.00              |         |
| LTBI testing and treatment by follow-up period |              |                   |                   |         |
| Model 2¶<br>< 6 months                         |              |                   |                   |         |
| Yes                                            | 48/25.2      | #1.90(1.43-2.52)  | 15.72 (10.3-23.9) | <0.0001 |
| No                                             | 35/19.5      | #1.78 (1.28-2.49) | 1.00              |         |
| Model 3<br>> 6 months                          |              |                   |                   |         |
| Yes                                            | 33/80961     | 40.7 (28.9-57.3)  | 0.56 (0.39-0.79)  | 0.001   |
| No                                             | 1126/1557174 | 72.3 (68.2-76.6)  | 1.00              |         |
| Model 4<br>1 year                              |              |                   |                   |         |
| Yes                                            | 18/76490     | 23.5 (14.8-37.3)  | 0.43 (0.27-0.68)  | <0.0001 |
| No                                             | 977/1555582  | 62.8 (58.9-66.8)  | 1.00              |         |
| Model 5<br>2 years                             |              |                   |                   |         |
| Yes                                            | 8/57548      | 13.9 (6.95-27.8)  | 0.44 (0.22-0.86)  | 0.017   |
| No                                             | 698/1474486  | 47.3 (43.9-50.9)  | 1.00              |         |
| Model 6<br>3 years                             |              |                   |                   |         |
| Yes                                            | 2/30296      | 6.60 (1.65-26.4)  | 0.31 (0.07-1.27)  | 0.105   |
| No                                             | 464/1352527  | 34.3 (31.3-37.5)  | 1.00              |         |

305

306 **Supplementary table S7. Time ratios from multivariate parametric Log Normal regression model**  
307 **predicting the time to TB diagnosis.** ETS: Enhanced Tuberculosis Surveillance system, CCG: Clinical  
308 Commissioning Group, LTBI: Latent TB infection. n=332,398, the model includes 55 CCGs and 3,028 primary  
309 care practices.

310

| Characteristic                                                                      | Time ratio (95% CI) | P value |
|-------------------------------------------------------------------------------------|---------------------|---------|
| Model 1                                                                             |                     |         |
| Age group — no. (%)                                                                 |                     |         |
| 16 – 25 years                                                                       | 1.13 (0.99-1.28)    | 0.063   |
| 26 – 35 years                                                                       | 1.00                |         |
| Sex — no. (%)                                                                       |                     |         |
| Female                                                                              | 1.00                |         |
| Male                                                                                | 1.34 (1.17-1.52)    | <0.0001 |
| ETS region of origin — no. (%)                                                      |                     |         |
| Africa                                                                              | 1.00                |         |
| Americas, Europe                                                                    | 0                   |         |
| East and South East Asia                                                            | 1.62 (1.13-2.33)    | 0.008   |
| South Asia                                                                          | 0.97 (0.80-1.19)    | 0.835   |
| WHO estimated TB incidence in country of origin (cases per 100 000) — no. (%)       |                     |         |
| 40-149                                                                              | 1.00                |         |
| 150-349                                                                             | 1.40 (1.09-1.80)    | 0.007   |
| >350                                                                                | 1.47 (1.05-2.05)    | 0.022   |
| UKHSA estimated TB incidence in CCG area of residence (cases per 100 000) — no. (%) |                     |         |
| ≤ 9.2                                                                               | 1.00                |         |
| 9.3-31.6                                                                            | 0.96 (0.74-1.25)    | 0.804   |
| > 31.6                                                                              | 0.96 (0.71-1.29)    | 0.796   |
| Deprivation index — no. (%)                                                         |                     |         |
| 1–3 deciles (most deprived)                                                         | 1.00                |         |

|                                                                                                         |                      |         |
|---------------------------------------------------------------------------------------------------------|----------------------|---------|
| 4–6 deciles                                                                                             | 1.04 (0.90-1.21)     | 0.507   |
| 7–10 deciles (least deprived)                                                                           | 1.35 (1.07-1.70)     | 0.010   |
| Year of arrival in England or primary care registration — no. (%)                                       |                      |         |
| 2011-2012                                                                                               | 1.00                 |         |
| 2013-2014                                                                                               | 0.72 (0.59-0.88)     | 0.001   |
| 2015-2016                                                                                               | 0.66 (0.54-0.80)     | <0.0001 |
| 2017-2018                                                                                               | 0.91 (0.72-1.16)     | 0.476   |
| Pre-entry active TB screening                                                                           |                      |         |
| Yes                                                                                                     | 0.74 (0.57-0.97)     | 0.031   |
| No                                                                                                      | 1.00                 |         |
| Effect modification: pre-entry screening (Yes)/year of arrival in England or primary care registration* |                      |         |
| 2011-2012                                                                                               | 1.00                 |         |
| 2013-2014                                                                                               | 1.22 (0.82-1.84)     | 0.316   |
| 2015-2016                                                                                               | 1.43 (0.97-2.10)     | 0.068   |
| 2017-2018                                                                                               | 2.03 (1.27-3.24)     | 0.003   |
| LTBI testing and treatment                                                                              |                      |         |
| Yes                                                                                                     | 0.44 (0.33-0.58)     | <0.0001 |
| No                                                                                                      | 1.00                 |         |
| Area level variance                                                                                     |                      |         |
| CCG                                                                                                     | 0.005 (0.0007-0.463) |         |
| General practice                                                                                        | 0.320 (0.209-0.491)  |         |
| Model Likelihood-ratio test                                                                             | <0.0001              |         |
| LTBI testing and treatment by follow-up period                                                          |                      |         |
| Model 2¶ < 6 months                                                                                     | 0.39 (0.32-0.47)     | <0.0001 |
| Model 3 > 6 months                                                                                      | 1.52 (1.03-2.24)     | 0.032   |
| Model 4 1 year                                                                                          | 1.78 (1.11-2.87)     | 0.016   |
| Model 5 2 year                                                                                          | 1.31 (0.78-2.23)     | 0.301   |

311

312 **Supplementary table S8. Hazard ratios from multivariate Cox regression model predicting the time to TB**  
313 **diagnosis according to IGRA status.** \*The number of events include only participants with no missing  
314 information for that characteristic. § The hazard ratio, 95% CI and p value estimates were derived from the total  
315 cohort of IGRA-positive individuals who did not start LTBI treatment n=19968. Individuals with IGRA results  
316 indeterminate or with no results were excluded. ETS: Enhanced Tuberculosis Surveillance system, CCG: Clinical  
317 Commissioning Group, LTBI: Latent TB infection

318

| Characteristic                    | No. of events/<br>Person-years of<br>Follow-up* | Rate per 100000<br>Person-years (95%CI) | §Hazard ratio (95%<br>CI) | P value |
|-----------------------------------|-------------------------------------------------|-----------------------------------------|---------------------------|---------|
| IGRA status                       |                                                 |                                         |                           |         |
| Positive                          | 128/10684                                       | 1190 (1000-1420)                        | 29.1 (14.4-59.0)          | <0.0001 |
| Negative                          | 24/64537                                        | 37 (24-55)                              | 1.00                      |         |
| Age group — no. (%)               |                                                 |                                         |                           |         |
| 16 – 25 years                     | 62/33747                                        | 183 (143-235)                           | 1.24 (0.77-1.99)          | 0.367   |
| 26 – 35 years                     | 97/42849                                        | 226 (185-276)                           | 1.00                      |         |
| Sex — no. (%)                     |                                                 |                                         |                           |         |
| Female                            | 94/33899                                        | 277 (226-339)                           | 1.00                      |         |
| Male                              | 63/41010                                        | 153 (120-196)                           | 0.81 (0.51-1.29)          | 0.386   |
| ETS region of origin —<br>no. (%) |                                                 |                                         |                           |         |
| Africa                            | 24/7598                                         | 315 (211-471)                           | 1.00                      |         |
| Americas, Europe                  | 0/614                                           | 0                                       | 0                         |         |

|                                                                                    |          |                |                  |       |
|------------------------------------------------------------------------------------|----------|----------------|------------------|-------|
| East and South East Asia                                                           | 2/1045   | 191 (478-764)  | 0.34 (0.04-2.85) | 0.321 |
| South Asia                                                                         | 58/35394 | 163 (126-211)  | 1.01 (0.47-2.19) | 0.964 |
| WHO estimated TB incidence in country of origin (cases per 100000) — no. (%)       |          |                |                  |       |
| 40-149                                                                             | 12/3.856 | 311 (176-547)  | 1.00             |       |
| 150-349                                                                            | 67/39690 | 168 (132-214)  | 0.69 (0.26-1.82) | 0.463 |
| >350                                                                               | 5/1106   | 451 (188-1080) | 1.62 (0.46-5.65) | 0.444 |
| UKHSA estimated TB incidence in CCG area of residence (cases per 100000) — no. (%) |          |                |                  |       |
| ≤ 9.2                                                                              | 8/5668   | 141 (70-282)   | 1.00             |       |
| 9.3-31.6                                                                           | 61/25554 | 238 (185-306)  | 1.38 (0.53-3.59) | 0.497 |
| > 31.6                                                                             | 69/37733 | 182 (144-231)  | 1.18 (0.44-3.12) | 0.734 |
| Deprivation index — no. (%)                                                        |          |                |                  |       |
| 1-3 deciles (most deprived)                                                        | 91/45531 | 199 (162-245)  | 1.00             |       |
| 4-6 deciles                                                                        | 50/23543 | 212 (160-280)  | 1.56 (0.95-2.56) | 0.077 |
| 7-10 deciles (least deprived)                                                      | 11/4965  | 221 (122-400)  | 0.85 (0.26-2.76) | 0.790 |
| Year of arrival in England or primary care registration — no. (%)                  |          |                |                  |       |
| 2011-2012                                                                          | 12/4684  | 256 (145-451)  | 1.00             |       |
| 2013-2014                                                                          | 16/6923  | 231 (141-377)  | 1.01 (0.47-2.15) | 0.969 |
| 2015-2016                                                                          | 32/17123 | 186 (132-264)  | 0.59 (0.29-1.19) | 0.145 |
| 2017-2018                                                                          | 24/15921 | 150 (101-224)  | 0.35 (0.17-0.73) | 0.005 |

319

320 **Supplementary table S9. Hazard ratios from multivariate Cox regression model predicting the time to TB**  
321 **diagnosis according to IGRA status.** \*The number of events include only participants with no missing  
322 information for that characteristic. § The hazard ratio, 95% CI and p value estimates were derived from the total  
323 cohort of migrants with positive IGRA that did not start LTBI treatment, excluding those who developed TB  
324 within 60 days of primary care registration or LTBI testing after imputing the missing values using a multiple  
325 imputation by chained equations model n=34740. Migrants with IGRA results indeterminate or with no results  
326 were excluded. ETS: Enhanced Tuberculosis Surveillance system, CCG: Clinical Commissioning Group, LTBI:  
327 Latent TB infection.

328

| Characteristic                 | No. of events/<br>Person-years of Follow-up* | Rate per 100000<br>Person-years (95% CI) | Hazard ratio (95% CI)<br>§ | P value |
|--------------------------------|----------------------------------------------|------------------------------------------|----------------------------|---------|
| IGRA status                    |                                              |                                          |                            |         |
| Positive                       | 76/10680                                     | 711 (568-890)                            | 18.6 (11.6-29.8)           | <0.0001 |
| Negative                       | 17/64536                                     | 26.3 (16.3-42.3)                         | 1.00                       |         |
| Age group — no. (%)            |                                              |                                          |                            |         |
| 16 – 25 years                  | 43/33745                                     | 127 (94.5-171)                           | 1.20 (0.79-1.81)           | 0.377   |
| 26 – 35 years                  | 53/42846                                     | 123 (94.5-161)                           | 1.00                       |         |
| Sex — no. (%)                  |                                              |                                          |                            |         |
| Female                         | 55/33896                                     | 162 (124-211)                            | 1.00                       |         |
| Male                           | 40/41008                                     | 97.5 (71.5-132)                          | 0.66 (0.44-0.99)           | 0.047   |
| ETS region of origin — no. (%) |                                              |                                          |                            |         |
| Africa                         | 17/7597                                      | 223 (139-359)                            | 1.00                       |         |
| Americas, Europe               | 0/614                                        | 0                                        | 0                          |         |

|                                                                                    |          |                 |                  |       |
|------------------------------------------------------------------------------------|----------|-----------------|------------------|-------|
| East and South East Asia                                                           | 1/1045   | 95.6 (134-679)  | 0.86 (0.11-6.69) | 0.886 |
| South Asia                                                                         | 32/35392 | 90.4 (63.9-127) | 0.76 (0.29-1.98) | 0.542 |
| WHO estimated TB incidence in country of origin (cases per 100000) — no. (%)       |          |                 |                  |       |
| 40-149                                                                             | 12/3856  | 259 (139-481)   | 1.00             |       |
| 150-349                                                                            | 39/39687 | 98.2 (71.8-134) | 0.61 (0.24-1.59) | 0.284 |
| >350                                                                               | 1/1106   | 90.4 (12.7-641) | 0.41 (0.08-1.93) | 0.252 |
| UKHSA estimated TB incidence in CCG area of residence (cases per 100000) — no. (%) |          |                 |                  |       |
| ≤ 9.2                                                                              | 6/5668   | 105 (47.5-235)  | 1.00             |       |
| 9.3-31.6                                                                           | 31/25552 | 121 (85.3-172)  | 1.34 (0.55-3.24) | 0.509 |
| > 31.6                                                                             | 46/37731 | 121 (91.3-162)  | 0.97 (0.38-2.46) | 0.963 |
| Deprivation index — no. (%)                                                        |          |                 |                  |       |
| 1-3 deciles (most deprived)                                                        | 57/45528 | 125 (96.5-162)  | 1.00             |       |
| 4-6 deciles                                                                        | 29/23541 | 123 (85.6-177)  | 0.95 (0.60-1.49) | 0.835 |
| 7-10 deciles (least deprived)                                                      | 7/4965   | 140 (67.2-295)  | 1.24 (0.56-2.77) | 0.588 |
| Year of arrival in England or primary care registration — no. (%)                  |          |                 |                  |       |
| 2011-2012                                                                          | 6/4684   | 128 (57.5-285)  | 1.00             |       |
| 2013-2014                                                                          | 13/6923  | 187 (109-323)   | 2.29 (0.91-5.76) | 0.076 |
| 2015-2016                                                                          | 18/17122 | 105 (66.2-166)  | 0.81 (0.35-1.86) | 0.623 |
| 2017-2018                                                                          | 13/15920 | 81.6 (47.4-140) | 0.22 (0.08-0.60) | 0.003 |

329

330 **Supplementary table S10. Hazard ratios from multivariate Cox regression model predicting the time to TB**

331 **diagnosis according to IGRA status.** \*The number of events include only participants with no missing

332 information for that characteristic. § The hazard ratio, 95% CI and p value estimates were derived from the total

333 cohort of migrants with positive IGRA that did not start LTBI treatment, excluding those who developed TB

334 within 90 days of primary care registration or LTBI testing after imputing the missing values using a multiple

335 imputation by chained equations model n=34724. Migrants with IGRA results indeterminate or with no results

336 were excluded. ETS: Enhanced Tuberculosis Surveillance system, CCG: Clinical Commissioning Group, LTBI:

337 Latent TB infection.

338

| Characteristic                 | No. of events/<br>Person-years of Follow-up* | Rate per 100000<br>Person-years (95%CI) | Hazard ratio (95% CI)<br>§ | P value |
|--------------------------------|----------------------------------------------|-----------------------------------------|----------------------------|---------|
| IGRA status                    |                                              |                                         |                            |         |
| Positive                       | 60/10677                                     | 561 (436-723)                           | 14.6 (8.97-23.7)           | <0.0001 |
| Negative                       | 14/64535                                     | 21.6 (12.8-36.6)                        | 1.00                       |         |
| Age group — no. (%)            |                                              |                                         |                            |         |
| 16 – 25 years                  | 34/33743                                     | 100 (72-141)                            | 1.15 (0.73-1.80)           | 0.526   |
| 26 – 35 years                  | 42/42843                                     | 98 (72.4-132)                           | 1.00                       |         |
| Sex — no. (%)                  |                                              |                                         |                            |         |
| Female                         | 41/33893                                     | 120 (89-164)                            | 1.00                       |         |
| Male                           | 34/41007                                     | 82.9 (59.2-116)                         | 0.70 (0.45-1.09)           | 0.122   |
| ETS region of origin — no. (%) |                                              |                                         |                            |         |
| Africa                         | 13/7597                                      | 171 (99.3-294)                          | 1.00                       |         |
| Americas, Europe               | 0/614                                        | 0                                       | 0                          |         |

|                                                                                    |          |                 |                  |       |
|------------------------------------------------------------------------------------|----------|-----------------|------------------|-------|
| East and South East Asia                                                           | 1/1045   | 95.6 (13.4-679) | 0.99 (0.13-7.31) | 1.00  |
| South Asia                                                                         | 28/35391 | 79.1 (54.6-114) | 0.74 (0.27-1.97) | 0.514 |
| WHO estimated TB incidence in country of origin (cases per 100000) — no. (%)       |          |                 |                  |       |
| 40-149                                                                             | 7/3855   | 181 (86.5-380)  | 1.00             |       |
| 150-349                                                                            | 34/39686 | 85.6 (61.2-119) | 0.70 (0.21-2.29) | 0.514 |
| >350                                                                               | 1/1106   | 90.4 (12.7-641) | 0.39 (0.05-3.13) | 0.364 |
| UKHSA estimated TB incidence in CCG area of residence (cases per 100000) — no. (%) |          |                 |                  |       |
| ≤ 9.2                                                                              | 5/5668   | 88.2 (36.7-211) | 1.00             |       |
| 9.3-31.6                                                                           | 22/25550 | 86.1 (56.7-130) | 1.33 (0.51-3.45) | 0.555 |
| > 31.6                                                                             | 38/37729 | 100 (73.2-138)  | 0.98 (0.35-2.73) | 0.978 |
| Deprivation index — no. (%)                                                        |          |                 |                  |       |
| 1-3 deciles (most deprived)                                                        | 45/45525 | 98.8 (73.8-132) | 1.00             |       |
| 4-6 deciles                                                                        | 25/23540 | 106 (71.7-157)  | 1.07 (0.65-1.73) | 0.783 |
| 7-10 deciles (least deprived)                                                      | 4/4964   | 80.5 (30.2-214) | 1.32 (0.55-3.15) | 0.531 |
| Year of arrival in England or primary care registration — no. (%)                  |          |                 |                  |       |
| 2011-2012                                                                          | 4/4684   | 85.3 (32-227)   | 1.00             |       |
| 2013-2014                                                                          | 11/6922  | 158 (87.9-286)  | 2.34 (0.86-6.36) | 0.095 |
| 2015-2016                                                                          | 15/17121 | 87.6 (52.8-145) | 0.73 (0.28-1.86) | 0.513 |
| 2017-2018                                                                          | 12/15919 | 75.3 (42.8-132) | 0.24 (0.08-0.69) | 0.008 |

339

340 **Supplementary table S11. Time ratios from multivariate parametric Log Normal regression model**  
341 **predicting the time to TB diagnosis according to IGRA status.** ETS: Enhanced Tuberculosis Surveillance  
342 system, CCG: Clinical Commissioning Group, LTBI: Latent TB infection. n=19968, the model includes 55 CCGs.

343

| Characteristic                                                                      | Time ratio (95% CI)  | P value |
|-------------------------------------------------------------------------------------|----------------------|---------|
| IGRA status                                                                         |                      |         |
| Positive                                                                            | 0.001 (0.0002-0.008) | <0.0001 |
| Negative                                                                            | 1.00                 |         |
| Age group — no. (%)                                                                 |                      |         |
| 16 – 25 years                                                                       | 0.74 (0.26-2.14)     | 0.590   |
| 26 – 35 years                                                                       | 1.00                 |         |
| Sex — no. (%)                                                                       |                      |         |
| Female                                                                              | 1.00                 |         |
| Male                                                                                | 1.57 (0.56-4.38)     | 0.383   |
| ETS region of origin — no. (%)                                                      |                      |         |
| Africa                                                                              | 1.00                 |         |
| Americas, Europe                                                                    | 0                    |         |
| East and South East Asia                                                            | 11.05 (0.10-1144)    | 0.310   |
| South Asia                                                                          | 1.14 (0.21-6.21)     | 0.877   |
| WHO estimated TB incidence in country of origin (cases per 100 000) — no. (%)       |                      |         |
| 40-149                                                                              | 1.00                 |         |
| 150-349                                                                             | 1.70 (0.19-15.28)    | 0.634   |
| >350                                                                                | 0.23 (0.01-4.56)     | 0.338   |
| UKHSA estimated TB incidence in CCG area of residence (cases per 100 000) — no. (%) |                      |         |
| ≤ 9.2                                                                               | 1.00                 |         |
| 9.3-31.6                                                                            | 0.55 (0.03-7.73)     | 0.660   |
| > 31.6                                                                              | 0.39 (0.02-7.47)     | 0.534   |
| Deprivation index — no. (%)                                                         |                      |         |
| 1-3 deciles (most deprived)                                                         | 1.00                 |         |
| 4-6 deciles                                                                         | 0.43 (0.13-1.44)     | 0.175   |
| 7-10 deciles (least deprived)                                                       | 1.53 (0.12-18.76)    | 0.739   |
| Year of arrival in England or primary care registration — no. (%)                   |                      |         |

|                             |                   |       |
|-----------------------------|-------------------|-------|
| 2011-2012                   | 1.00              |       |
| 2013-2014                   | 1.03 (0.17-6.03)  | 0.969 |
| 2015-2016                   | 2.69 (0.52-13.8)  | 0.235 |
| 2017-2018                   | 6.73 (1.20-37.69) | 0.030 |
| Area level variance         |                   |       |
| CCG                         | 2.82 (0.79-10.06) |       |
| Model Likelihood-ratio test | 0.008             |       |

344

345 **Supplementary table S12. Hazard ratios from multivariate Cox regression model predicting the time to TB**  
346 **diagnosis according to treatment status.** \*The number of events include only participants with no missing  
347 information for that characteristic. § The hazard ratio, 95% CI and p value estimates were derived from the total  
348 cohort IGRA-positive individuals with no missing values n=3,812. ETS: Enhanced Tuberculosis Surveillance  
349 system, CCG: Clinical Commissioning Group, LTBI: Latent TB infection

350

| Characteristic                                                                               | No. of events/<br>Person-years of<br>Follow-up* | Rate per 1000 Person-<br>years (95%CI) | Hazard ratio (95% CI)<br>§ | P value |
|----------------------------------------------------------------------------------------------|-------------------------------------------------|----------------------------------------|----------------------------|---------|
| Treatment                                                                                    |                                                 |                                        |                            |         |
| Yes                                                                                          | 7/3728                                          | 187 (89-393)                           | 0.12 (0.03-0.41)           | 0.001   |
| No                                                                                           | 128/11742                                       | 1090 (916-1296)                        | 1.00                       |         |
| Age group — no. (%)                                                                          |                                                 |                                        |                            |         |
| 16 – 25 years                                                                                | 50/4892                                         | 1020 (774-1340)                        | 1.23 (0.74-2.05)           | 0.418   |
| 26 – 35 years                                                                                | 83/10218                                        | 812 (655-1007)                         | 1.00                       |         |
| Sex — no. (%)                                                                                |                                                 |                                        |                            |         |
| Female                                                                                       | 80/7747                                         | 1032 (829-1280)                        | 1.00                       |         |
| Male                                                                                         | 53/7415                                         | 714 (546-935)                          | 0.86 (0.52-1.42)           | 0.568   |
| ETS region of origin —<br>no. (%)                                                            |                                                 |                                        |                            |         |
| Africa                                                                                       | 21/2323                                         | 903 (589-1380)                         | 1.00                       |         |
| Americas,<br>Europe                                                                          | 0/68.51                                         | 0                                      | 0                          |         |
| East and South East<br>Asia                                                                  | 2/258                                           | 772 (193-3080)                         | 0.43 (0.05-3.65)           | 0.441   |
| South Asia                                                                                   | 52/6845                                         | 759 (578-996)                          | 0.99 (0.44-2.26)           | 0.999   |
| WHO estimated TB<br>incidence in country of<br>origin (cases per 100<br>000) — no. (%)       |                                                 |                                        |                            |         |
| 40-149                                                                                       | 9/988                                           | 910 (473-1750)                         | 1.00                       |         |
| 150-349                                                                                      | 61/8157                                         | 747 (581-961)                          | 0.83 (0.28-2.39)           | 0.736   |
| >350                                                                                         | 5/351                                           | 1420 (592-3410)                        | 2.21 (0.60-8.14)           | 0.231   |
| UKHSA estimated TB<br>incidence in CCG area<br>of residence (cases per<br>100 000) — no. (%) |                                                 |                                        |                            |         |
| ≤ 9.2                                                                                        | 8/1176                                          | 680 (340-1360)                         | 1.00                       |         |
| 9.3-31.6                                                                                     | 54/5461                                         | 988 (757-1290)                         | 1.41 (0.54-3.68)           | 0.474   |
| > 31.6                                                                                       | 53/7373                                         | 718 (549-940)                          | 0.47 (0.17-1.28)           | 0.143   |
| Deprivation index —<br>no. (%)                                                               |                                                 |                                        |                            |         |
| 1–3 deciles (most<br>deprived)                                                               | 80/9246                                         | 865 (694-1070)                         | 1.00                       |         |
| 4–6 deciles                                                                                  | 39/4574                                         | 852 (622-1160)                         | 1.47 (0.87-2.49)           | 0.143   |
| 7–10 deciles (least<br>deprived)                                                             | 9/858                                           | 1040 (545-2010)                        | 0.55 (0.13-2.35)           | 0.426   |
| Year of arrival in<br>England or primary care<br>registration — no. (%)                      |                                                 |                                        |                            |         |
| 2011-2012                                                                                    | 12/978                                          | 1220 (696-2150)                        | 1.00                       |         |
| 2013-2014                                                                                    | 15/1438                                         | 1042 (628-1730)                        | 1.00 (0.45-2.25)           | 0.938   |
| 2015-2016                                                                                    | 29/3844                                         | 754 (524-1080)                         | 0.73 (0.34-1.55)           | 0.416   |
| 2017-2018                                                                                    | 19/3235                                         | 587 (374-920)                          | 1.50 (0.64-3.50)           | 0.348   |

351

352

353 **Supplementary table S13. Time ratios from multivariate parametric Log Normal regression model**  
 354 **predicting the time to TB diagnosis according to treatment status.** ETS: Enhanced Tuberculosis Surveillance  
 355 system, CCG: Clinical Commissioning Group, LTBI: Latent TB infection. n=3812, the model includes 55 CCGs.

356

| Characteristic                                                                      | Time ratio (95% CI) | P value |
|-------------------------------------------------------------------------------------|---------------------|---------|
| Treatment                                                                           |                     |         |
| Yes                                                                                 | 1.78 (1.24-2.56)    | 0.002   |
| No                                                                                  | 1.00                |         |
| Age group — no. (%)                                                                 |                     |         |
| 16 – 25 years                                                                       | 0.95 (0.78-1.16)    | 0.666   |
| 26 – 35 years                                                                       | 1.00                |         |
| Sex — no. (%)                                                                       |                     |         |
| Female                                                                              | 1.00                |         |
| Male                                                                                | 1.03 (0.85-1.25)    | 0.715   |
| ETS region of origin — no. (%)                                                      |                     |         |
| Africa                                                                              | 1.00                |         |
| Americas,<br>Europe                                                                 | 0                   |         |
| East and South East Asia                                                            | 1.48 (0.61-3.60)    | 0.378   |
| South Asia                                                                          | 0.97 (0.70-1.33)    | 0.851   |
| WHO estimated TB incidence in country of origin (cases per 100 000) — no. (%)       |                     |         |
| 40-149                                                                              | 1.00                |         |
| 150-349                                                                             | 0.98 (0.64-1.51)    | 0.940   |
| >350                                                                                | 0.69 (0.38-1.23)    | 0.217   |
| UKHSA estimated TB incidence in CCG area of residence (cases per 100 000) — no. (%) |                     |         |
| ≤ 9.2                                                                               | 1.00                |         |
| 9.3-31.6                                                                            | 0.85 (0.54-1.35)    | 0.514   |
| > 31.6                                                                              | 1.09 (0.65-1.82)    | 0.732   |
| Deprivation index — no. (%)                                                         |                     |         |
| 1–3 deciles (most deprived)                                                         | 1.00                |         |
| 4–6 deciles                                                                         | 0.92 (0.74-1.16)    | 0.509   |
| 7–10 deciles (least deprived)                                                       | 1.31 (0.76-2.24)    | 0.324   |
| Year of arrival in England or primary care registration — no. (%)                   |                     |         |
| 2011-2012                                                                           | 1.00                |         |
| 2013-2014                                                                           | 1.03 (0.74-1.43)    | 0.852   |
| 2015-2016                                                                           | 1.20 (0.88-1.63)    | 0.234   |
| 2017-2018                                                                           | 1.00 (0.73-1.37)    | 0.984   |
| Area level variance                                                                 |                     |         |
| CCG                                                                                 | 0.06 (0.01-0.29)    |         |
| Model Likelihood-ratio test                                                         | 0.024               |         |

357

358 **Supplementary table S14. Hazard ratios from multivariate Cox regression model predicting the time to TB**  
 359 **diagnosis according to treatment status in individuals with documented date of treatment completion**  
 360 **derived from complete case analysis.** § The hazard ratio, 95% CI and p value estimates were derived from the  
 361 total cohort of IGRA-positive individuals with confirmed date of treatment completion and no missing values  
 362 n=3400. ETS: Enhanced Tuberculosis Surveillance system, CCG: Clinical Commissioning Group, LTBI: Latent  
 363 TB infection

364

| Characteristic                 | Hazard ratio (95% CI)<br>§ | P value |
|--------------------------------|----------------------------|---------|
| Treatment                      |                            |         |
| Yes                            | 0.13 (0.03-0.55)           | 0.006   |
| No                             | 1.00                       |         |
| Age group — no. (%)            |                            |         |
| 16 – 25 years                  | 1.29 (0.77-2.15)           | 0.327   |
| 26 – 35 years                  | 1.00                       |         |
| Sex — no. (%)                  |                            |         |
| Female                         | 1.00                       |         |
| Male                           | 0.89 (0.53-1.47)           | 0.656   |
| ETS region of origin — no. (%) |                            |         |



|                                                                                     |                  |       |
|-------------------------------------------------------------------------------------|------------------|-------|
| Africa                                                                              | 1.00             |       |
| Americas, Europe                                                                    | 0                |       |
| East and South East Asia                                                            | 0.44 (0.05-3.74) | 0.453 |
| South Asia                                                                          | 0.96 (0.42-2.19) | 0.932 |
| WHO estimated TB incidence in country of origin (cases per 100 000) — no. (%)       |                  |       |
| 40-149                                                                              | 1.00             |       |
| 150-349                                                                             | 0.82 (0.28-2.38) | 0.728 |
| >350                                                                                | 2.17 (0.58-7.99) | 0.244 |
| UKHSA estimated TB incidence in CCG area of residence (cases per 100 000) — no. (%) |                  |       |
| ≤ 9.2                                                                               | 1.00             |       |
| 9.3-31.6                                                                            | 1.41 (0.54-3.69) | 0.473 |
| > 31.6                                                                              | 0.47 (0.17-1.29) | 0.147 |
| Deprivation index — no. (%)                                                         |                  |       |
| 1–3 deciles (most deprived)                                                         | 1.00             |       |
| 4–6 deciles                                                                         | 1.51 (0.89-2.56) | 0.123 |
| 7–10 deciles (least deprived)                                                       | 0.56 (0.13-2.36) | 0.431 |
| Year of arrival in England or primary care registration — no. (%)                   |                  |       |
| 2011-2012                                                                           | 1.00             |       |
| 2013-2014                                                                           | 1.11 (0.48-2.54) | 0.800 |
| 2015-2016                                                                           | 0.81 (0.37-1.78) | 0.611 |
| 2017-2018                                                                           | 1.74 (0.72-4.16) | 0.213 |

365

366 **Supplementary table S15. Hazard ratios from multivariate Cox regression model predicting the time to TB**  
367 **diagnosis according to treatment status in individuals with documented date of treatment completion.** §  
368 The hazard ratio, 95% CI and p value estimates were derived from the total cohort of IGRA-positive individuals  
369 with confirmed date of treatment completion and imputed data for missing values n=5878. ETS: Enhanced  
370 Tuberculosis Surveillance system, CCG: Clinical Commissioning Group, LTBI: Latent TB infection.

371

| Characteristic                                                                | Hazard ratio (95% CI)<br>§ | P value |
|-------------------------------------------------------------------------------|----------------------------|---------|
| Treatment                                                                     |                            |         |
| Yes                                                                           | 0.08 (0.02-0.26)           | <0.0001 |
| No                                                                            | 1.00                       |         |
| Age group — no. (%)                                                           |                            |         |
| 16 – 25 years                                                                 | 1.15 (0.80-1.66)           | 0.438   |
| 26 – 35 years                                                                 | 1.00                       |         |
| Sex — no. (%)                                                                 |                            |         |
| Female                                                                        | 1.00                       |         |
| Male                                                                          | 0.70 (0.49-1.00)           | 0.051   |
| ETS region of origin — no. (%)                                                |                            |         |
| Africa                                                                        | 1.00                       |         |
| Americas, Europe                                                              | 0                          |         |
| East and South East Asia                                                      | 0.89 (0.19-4.09)           | 0.886   |
| South Asia                                                                    | 0.91 (0.45-1.82)           | 0.777   |
| WHO estimated TB incidence in country of origin (cases per 100 000) — no. (%) |                            |         |
| 40-149                                                                        | 1.00                       |         |
| 150-349                                                                       | 0.74 (0.39-1.41)           | 0.357   |
| >350                                                                          | 0.96 (0.31-3.01)           | 0.954   |

|                                                                                     |                  |         |
|-------------------------------------------------------------------------------------|------------------|---------|
| UKHSA estimated TB incidence in CCG area of residence (cases per 100 000) — no. (%) |                  |         |
| ≤ 9.2                                                                               | 1.00             |         |
| 9.3-31.6                                                                            | 1.57 (0.72-3.39) | 0.247   |
| > 31.6                                                                              | 0.86 (0.40-1.86) | 0.709   |
| Deprivation index — no. (%)                                                         |                  |         |
| 1–3 deciles (most deprived)                                                         | 1.00             |         |
| 4–6 deciles                                                                         | 1.02 (0.67-1.54) | 0.905   |
| 7–10 deciles (least deprived)                                                       | 1.16 (0.57-2.33) | 0.677   |
| Year of arrival in England or primary care registration — no. (%)                   |                  |         |
| 2011-2012                                                                           | 1.00             |         |
| 2013-2014                                                                           | 1.48 (0.74-2.96) | 0.266   |
| 2015-2016                                                                           | 0.76 (0.40-1.44) | 0.407   |
| 2017-2018                                                                           | 0.21 (0.10-0.46) | <0.0001 |

372

373 **Supplementary table S16. Hazard ratios from multivariate Cox regression model predicting the time to TB**  
374 **diagnosis according to treatment status.** \*The number of events include only participants with no missing  
375 information for that characteristic. § The hazard ratio, 95% CI and p value estimates were derived from the total  
376 cohort IGRA-positive individuals with no missing values excluding those who developed TB within 60 days of  
377 primary care registration or LTBI testing and 21 days after starting treatment n=3785. ETS: Enhanced  
378 Tuberculosis Surveillance system, CCG: Clinical Commissioning Group, LTBI: Latent TB infection

379

| Characteristic                                                                               | No. of events/<br>Person-years of<br>Follow-up* | Rate per 1000 Person-<br>years (95%CI) | Hazard ratio (95% CI)<br>§ | P value |
|----------------------------------------------------------------------------------------------|-------------------------------------------------|----------------------------------------|----------------------------|---------|
| Treatment                                                                                    |                                                 |                                        |                            |         |
| Yes                                                                                          | 6/3728                                          | 160 (72.3-358)                         | 0.17 (0.04-0.77)           | 0.021   |
| No                                                                                           | 76/11616                                        | 654 (522-819)                          | 1.00                       |         |
| Age group — no. (%)                                                                          |                                                 |                                        |                            |         |
| 16 – 25 years                                                                                | 34/4855                                         | 700 (500-980)                          | 2.08 (1.05-4.10)           | 0.033   |
| 26 – 35 years                                                                                | 46/10129                                        | 454 (340-606)                          | 1.00                       |         |
| Sex — no. (%)                                                                                |                                                 |                                        |                            |         |
| Female                                                                                       | 47/7668                                         | 612 (460-815)                          | 1.00                       |         |
| Male                                                                                         | 34/7370                                         | 461 (329-645)                          | 0.95 (0.49-1.85)           | 0.898   |
| ETS region of origin —<br>no. (%)                                                            |                                                 |                                        |                            |         |
| Africa                                                                                       | 14/2305                                         | 607 (359-1025)                         | 1.00                       |         |
| Americas,<br>Europe                                                                          | 0/68.51                                         | 0                                      | 0                          |         |
| East and South East<br>Asia                                                                  | 1/255                                           | 390 (55-2774)                          | 0                          | 0       |
| South Asia                                                                                   | 28/6791                                         | 412 (284-597)                          | 0.70 (0.26-1.88)           | 0.485   |
| WHO estimated TB<br>incidence in country of<br>origin (cases per 100<br>000) — no. (%)       |                                                 |                                        |                            |         |
| 40-149                                                                                       | 7/982                                           | 712 (339-1493)                         | 1.00                       |         |
| 150-349                                                                                      | 35/8097                                         | 432 (310-601)                          | 0.93 (0.26-3.25)           | 0.913   |
| >350                                                                                         | 1/340                                           | 293 (41.3-2084)                        | 1.08 (0.12-9.33)           | 0.944   |
| UKHSA estimated TB<br>incidence in CCG area<br>of residence (cases per<br>100 000) — no. (%) |                                                 |                                        |                            |         |
| ≤ 9.2                                                                                        | 6/1169                                          | 513 (230-1142)                         | 1.00                       |         |
| 9.3-31.6                                                                                     | 29/5413                                         | 535 (372-770)                          | 0.81 (0.26-2.50)           | 0.722   |
| > 31.6                                                                                       | 35/7324                                         | 477 (343-665)                          | 0.36 (0.11-1.17)           | 0.092   |
| Deprivation index — no.<br>(%)                                                               |                                                 |                                        |                            |         |
| 1–3 deciles (most<br>deprived)                                                               | 52/9175                                         | 566 (431-743)                          | 1.00                       |         |
| 4–6 deciles                                                                                  | 21/4536                                         | 462 (301-710)                          | 1.33 (0.65-2.70)           | 0.421   |

|                                                                   |                                                    |                                                    |                  |       |
|-------------------------------------------------------------------|----------------------------------------------------|----------------------------------------------------|------------------|-------|
| 7–10 deciles (least deprived)                                     | 5/848                                              | 589 (245-1416)                                     | 0.53 (0.07-4.03) | 0.546 |
| Year of arrival in England or primary care registration — no. (%) |                                                    |                                                    |                  |       |
| 2011-2012                                                         | 5/963                                              | 519 (216-1247)                                     | 1.00             |       |
| 2013-2014                                                         | 13/1432                                            | 907 (526-1562)                                     | 1.96 (0.68-5.64) | 0.212 |
| 2015-2016                                                         | 16/3808                                            | 420 (257-685)                                      | 0.67 (0.22-2.01) | 0.483 |
| 2017-2018                                                         | 9/3216                                             | 279 (145-537)                                      | 0.43 (0.14-1.33) | 0.146 |
|                                                                   | Adjusted number needed to treat at 2 years (95%CI) | Adjusted number needed to treat at 3 years (95%CI) |                  |       |
|                                                                   | 33.7 (19-48.4)                                     | 28.6 (9.8-47.4)                                    |                  |       |

380

381 **Supplementary table S17. Hazard ratios from multivariate Cox regression model predicting the time to TB**  
382 **diagnosis according to treatment status.** \*The number of events include only participants with no missing  
383 information for that characteristic. § The hazard ratio, 95% CI and p value estimates were derived from the total  
384 cohort IGRA-positive individuals with no missing values excluding those who developed TB within 90 days of  
385 primary care registration or LTBI testing and 21 days after starting treatment n=3779. ETS: Enhanced  
386 Tuberculosis Surveillance system, CCG: Clinical Commissioning Group, LTBI: Latent TB infection

387

| Characteristic                                                                               | No. of events/<br>Person-years of<br>Follow-up* | Rate per 1000 Person-<br>years (95%CI) | Hazard ratio (95% CI)<br>§ | P value |
|----------------------------------------------------------------------------------------------|-------------------------------------------------|----------------------------------------|----------------------------|---------|
| Treatment                                                                                    |                                                 |                                        |                            |         |
| Yes                                                                                          | 5/3728                                          | 134 (55.8-322)                         | 0.21 (0.04-0.95)           | 0.044   |
| No                                                                                           | 60/11571                                        | 518 (402-667)                          | 1.00                       |         |
| Age group — no. (%)                                                                          |                                                 |                                        |                            |         |
| 16 – 25 years                                                                                | 27/4835                                         | 558 (382-814)                          | 2.01 (0.96-4.20)           | 0.063   |
| 26 – 35 years                                                                                | 37/10104                                        | 366 (265-505)                          | 1.00                       |         |
| Sex — no. (%)                                                                                |                                                 |                                        |                            |         |
| Female                                                                                       | 36/7638                                         | 471 (339-653)                          | 1.00                       |         |
| Male                                                                                         | 28/7355                                         | 380 (262-551)                          | 1.08 (0.52-2.24)           | 0.817   |
| ETS region of origin —<br>no. (%)                                                            |                                                 |                                        |                            |         |
| Africa                                                                                       | 10/2297                                         | 435 (234-808)                          | 1.00                       |         |
| Americas,<br>Europe                                                                          | 0/68.51                                         | 0                                      | 0                          |         |
| East and South East<br>Asia                                                                  | 1/255                                           | 390 (550-2774)                         | 0                          | 0       |
| South Asia                                                                                   | 24/6780                                         | 353 (273-528)                          | 0.59 (0.21-1.63)           | 0.314   |
| WHO estimated TB<br>incidence in country of<br>origin (cases per 100<br>000) — no. (%)       |                                                 |                                        |                            |         |
| 40-149                                                                                       | 4/974                                           | 410 (154-1093)                         | 1.00                       |         |
| 150-349                                                                                      | 30/8086                                         | 370 (259-530)                          | 1.54 (0.36-6.52)           | 0.554   |
| >350                                                                                         | 1/340                                           | 293 (41.3-2084)                        | 1.80 (0.18-17.5)           | 0.610   |
| UKHSA estimated TB<br>incidence in CCG area<br>of residence (cases per<br>100 000) — no. (%) |                                                 |                                        |                            |         |
| ≤ 9.2                                                                                        | 5/1166                                          | 428 (178-1030)                         | 1.00                       |         |
| 9.3-31.6                                                                                     | 22/5396                                         | 407 (268-619)                          | 0.65 (0.20-2.08)           | 0.477   |
| > 31.6                                                                                       | 28/7304                                         | 383 (264-555)                          | 0.28 (0.08-0.94)           | 0.040   |
| Deprivation index — no.<br>(%)                                                               |                                                 |                                        |                            |         |
| 1–3 deciles (most<br>deprived)                                                               | 40/9142                                         | 437 (320-596)                          | 1.00                       |         |
| 4–6 deciles                                                                                  | 18/4531                                         | 397 (250-630)                          | 1.49 (0.70-3.17)           | 0.294   |
| 7–10 deciles (least<br>deprived)                                                             | 4/844                                           | 473 (177-1261)                         | 0                          | 0       |
| Year of arrival in<br>England or primary care<br>registration — no. (%)                      |                                                 |                                        |                            |         |
| 2011-2012                                                                                    | 4/960                                           | 416 (156-1109)                         | 1.00                       |         |
| 2013-2014                                                                                    | 10/1428                                         | 700 (376-1301)                         | 2.05 (0.63-6.69)           | 0.230   |
| 2015-2016                                                                                    | 13/3798                                         | 342 (198-589)                          | 0.81 (0.23-2.83)           | 0.753   |

|           |                                                    |                                                    |                  |       |
|-----------|----------------------------------------------------|----------------------------------------------------|------------------|-------|
| 2017-2018 | 8/3214                                             | 248 (124-497)                                      | 2.54 (0.66-9.75) | 0.172 |
|           | Adjusted number needed to treat at 2 years (95%CI) | Adjusted number needed to treat at 3 years (95%CI) |                  |       |
|           | 34.8 (19.8-49.8)                                   | 30.3 (12.7-47.8)                                   |                  |       |

388

389

390 **Supplementary table S18. Hazard ratios from multivariate Cox regression model predicting the time to TB**391 **diagnosis according to treatment status.** \*The number of events include only participants with no missing

392 information for that characteristic. § The hazard ratio, 95% CI and p value estimates were derived from the total

393 cohort of migrants with positive IGRA, excluding those who developed TB within 60 days of primary care

394 registration or LTBI testing and 21 days after starting treatment, after imputing the missing values by multiple

395 imputation by chained equations n=6567. ETS: Enhanced Tuberculosis Surveillance system, CCG: Clinical

396 Commissioning Group, LTBI: Latent TB infection.

397

| Characteristic                                                                               | No. of events/<br>Person-years of<br>Follow-up* | Rate per 100000<br>Person-years (95%CI) | Hazard ratio (95% CI)<br>§ | P value |
|----------------------------------------------------------------------------------------------|-------------------------------------------------|-----------------------------------------|----------------------------|---------|
| Treatment                                                                                    |                                                 |                                         |                            |         |
| Yes                                                                                          | 6/3728                                          | 160 (72.3-358)                          | 0.23 (0.09-0.57)           | 0.001   |
| No                                                                                           | 76/11616                                        | 654 (522-819)                           | 1.00                       |         |
| Age group — no. (%)                                                                          |                                                 |                                         |                            |         |
| 16 – 25 years                                                                                | 34/4855                                         | 700 (500-980)                           | 1.61 (1.01-2.57)           | 0.044   |
| 26 – 35 years                                                                                | 46/10129                                        | 454 (340-606)                           | 1.00                       |         |
| Sex — no. (%)                                                                                |                                                 |                                         |                            |         |
| Female                                                                                       | 47/7668                                         | 612 (460-815)                           | 1.00                       |         |
| Male                                                                                         | 34/7370                                         | 461 (329-645)                           | 0.75 (0.48-1.17)           | 0.216   |
| ETS region of origin —<br>no. (%)                                                            |                                                 |                                         |                            |         |
| Africa                                                                                       | 14/2305                                         | 607 (359-1025)                          | 1.00                       |         |
| Americas,<br>Europe                                                                          | 0/68.51                                         | 0                                       | 0                          |         |
| East and South East<br>Asia                                                                  | 1/255                                           | 390 (55-2774)                           | 1.17 (0.14-9.89)           | 0.875   |
| South Asia                                                                                   | 28/6791                                         | 412 (284-597)                           | 0.78 (0.32-1.87)           | 0.555   |
| WHO estimated TB<br>incidence in country of<br>origin (cases per 100<br>000) — no. (%)       |                                                 |                                         |                            |         |
| 40-149                                                                                       | 7/982                                           | 712 (339-1493)                          | 1.00                       |         |
| 150-349                                                                                      | 35/8097                                         | 432 (310-601)                           | 0.66 (0.32-1.34)           | 0.242   |
| >350                                                                                         | 1/340                                           | 293 (41.3-2084)                         | 0.51 (0.07-3.57)           | 0.477   |
| UKHSA estimated TB<br>incidence in CCG area<br>of residence (cases per<br>100 000) — no. (%) |                                                 |                                         |                            |         |
| ≤ 9.2                                                                                        | 6/1169                                          | 513 (230-1142)                          | 1.00                       |         |
| 9.3-31.6                                                                                     | 29/5413                                         | 535 (372-770)                           | 1.19 (0.48-2.94)           | 0.697   |
| > 31.6                                                                                       | 35/7324                                         | 477 (343-665)                           | 0.54 (0.20-1.45)           | 0.224   |
| Deprivation index —<br>no. (%)                                                               |                                                 |                                         |                            |         |
| 1–3 deciles (most<br>deprived)                                                               | 52/9175                                         | 566 (431-743)                           | 1.00                       |         |
| 4–6 deciles                                                                                  | 21/4536                                         | 462 (301-710)                           | 0.98 (0.58-1.65)           | 0.942   |
| 7–10 deciles (least<br>deprived)                                                             | 5/848                                           | 589 (245-1416)                          | 1.08 (0.41-2.86)           | 0.868   |
| Year of arrival in<br>England or primary care<br>registration — no. (%)                      |                                                 |                                         |                            |         |

|           |         |                |                  |       |
|-----------|---------|----------------|------------------|-------|
| 2011-2012 | 5/963   | 519 (216-1247) | 1.00             |       |
| 2013-2014 | 13/1432 | 907 (526-1562) | 1.99 (0.75-5.33) | 0.165 |
| 2015-2016 | 16/3808 | 420 (257-685)  | 1.12 (0.45-2.80) | 0.794 |
| 2017-2018 | 9/3216  | 279 (145-537)  | 1.24 (0.40-3.82) | 0.699 |

398

399 **Supplementary table S19. Hazard ratios from multivariate Cox regression model predicting the time to TB**

400 **diagnosis according to treatment status.** \*The number of events include only participants with no missing

401 information for that characteristic. § The hazard ratio, 95% CI and p value estimates were derived from the total

402 cohort of migrants with positive IGRA, excluding those who developed TB within 90 days of primary care

403 registration or LTBI testing and 21 days after starting treatment, after imputing the missing values by multiple

404 imputation by chained equations n=6550. ETS: Enhanced Tuberculosis Surveillance system, CCG: Clinical

405 Commissioning Group, LTBI: Latent TB infection.

406

| Characteristic                                                                               | No. of events/<br>Person-years of<br>Follow-up* | Rate per 100000<br>Person-years (95%CI) | Hazard ratio (95% CI)<br>§ | P value |
|----------------------------------------------------------------------------------------------|-------------------------------------------------|-----------------------------------------|----------------------------|---------|
| Treatment                                                                                    |                                                 |                                         |                            |         |
| Yes                                                                                          | 5/3728                                          | 134 (55.8-322)                          | 0.25 (0.09-0.67)           | 0.006   |
| No                                                                                           | 60/11571                                        | 518 (402-667)                           | 1.00                       |         |
| Age group — no. (%)                                                                          |                                                 |                                         |                            |         |
| 16 – 25 years                                                                                | 27/4835                                         | 558 (382-814)                           | 1.60 (0.96-2.68)           | 0.070   |
| 26 – 35 years                                                                                | 37/10104                                        | 366 (265-505)                           | 1.00                       |         |
| Sex — no. (%)                                                                                |                                                 |                                         |                            |         |
| Female                                                                                       | 36/7638                                         | 471 (339-653)                           | 1.00                       |         |
| Male                                                                                         | 28/7355                                         | 380 (262-551)                           | 0.80 (0.48-1.32)           | 0.389   |
| ETS region of origin —<br>no. (%)                                                            |                                                 |                                         |                            |         |
| Africa                                                                                       | 10/2.297                                        | 435 (234-808)                           | 1.00                       |         |
| Americas,<br>Europe                                                                          | 0/68.51                                         | 0                                       | 0                          |         |
| East and South East<br>Asia                                                                  | 1/255                                           | 390 (550-2774)                          | 1.53 (0.18-12.3)           | 0.682   |
| South Asia                                                                                   | 24/6780                                         | 353 (273-528)                           | 0.81 (0.32-2.05)           | 0.648   |
| WHO estimated TB<br>incidence in country of<br>origin (cases per 100<br>000) — no. (%)       |                                                 |                                         |                            |         |
| 40-149                                                                                       | 4/974                                           | 410 (154-1093)                          | 1.00                       |         |
| 150-349                                                                                      | 30/8086                                         | 370 (259-530)                           | 0.76 (0.30-1.92)           | 0.558   |
| >350                                                                                         | 1/340                                           | 293 (41.3-2084)                         | 0.49 (0.02-9.27)           | 0.611   |
| UKHSA estimated TB<br>incidence in CCG area<br>of residence (cases per<br>100 000) — no. (%) |                                                 |                                         |                            |         |
| ≤ 9.2                                                                                        | 5/1166                                          | 428 (178-1030)                          | 1.00                       |         |
| 9.3-31.6                                                                                     | 22/5396                                         | 407 (268-619)                           | 1.08 (0.41-2.88)           | 0.866   |
| > 31.6                                                                                       | 28/7304                                         | 383 (264-555)                           | 0.50 (0.16-1.51)           | 0.221   |
| Deprivation index —<br>no. (%)                                                               |                                                 |                                         |                            |         |
| 1–3 deciles (most<br>deprived)                                                               | 40/9142                                         | 437 (320-596)                           | 1.00                       |         |
| 4–6 deciles                                                                                  | 18/4531                                         | 397 (250-630)                           | 1.04 (0.58-1.87)           | 0.879   |
| 7–10 deciles (least<br>deprived)                                                             | 4/844                                           | 473 (177-1261)                          | 1.07 (0.35-3.23)           | 0.901   |
| Year of arrival in<br>England or primary care<br>registration — no. (%)                      |                                                 |                                         |                            |         |
| 2011-2012                                                                                    | 4/960                                           | 416 (156-1109)                          | 1.00                       |         |

|           |         |                |                  |       |
|-----------|---------|----------------|------------------|-------|
| 2013-2014 | 10/1428 | 700 (376-1301) | 2.01 (0.66-6.11) | 0.214 |
| 2015-2016 | 13/3798 | 342 (198-589)  | 1.03 (0.37-2.87) | 0.944 |
| 2017-2018 | 8/3214  | 248 (124-497)  | 1.30 (0.38-4.42) | 0.673 |

407

408 **Supplementary table S20. Treatment regime and adverse reactions**

| Treatment regime    | n (%)        | Adverse reactions n (rate per 100) | Hepatotoxicity n (rate per 100) |
|---------------------|--------------|------------------------------------|---------------------------------|
| 3 months Rifinah    | 1564 (97.75) | 59 (3.77)                          | 5 (0.31)                        |
| 6 months isoniazid  | 34 (2.13)    | 15 (44.11)                         | 6 (17.6)                        |
| 4 months rifampicin | 2 (0.13)     | 0                                  | 0                               |
| Total               | 1600         | 74 (4.62)                          | 11 (0.68)                       |

409

410 **References**

411

- 412 1. Public Health England (PHE). Latent TB testing and treatment for  
413 migrants: a practical guide for commissioners and practitioners. 2015.  
414 [https://assets.publishing.service.gov.uk/government/uploads/system/uploads/attachment\\_data/file/442192/030615\\_LTB\\_testing\\_and\\_treatment\\_for\\_migrants\\_1.pdf](https://assets.publishing.service.gov.uk/government/uploads/system/uploads/attachment_data/file/442192/030615_LTB_testing_and_treatment_for_migrants_1.pdf) (accessed February 20, 2020).
- 415 2. Public Health England (PHE). Guidance for epidemiological  
416 surveillance to control tuberculosis (TB) and to identify cases for  
417 cohort review. 2014.  
418 [https://assets.publishing.service.gov.uk/government/uploads/system/uploads/attachment\\_data/file/360263/Guidance\\_on\\_Notifying\\_Tuberculosis\\_TB\\_cases.pdf](https://assets.publishing.service.gov.uk/government/uploads/system/uploads/attachment_data/file/360263/Guidance_on_Notifying_Tuberculosis_TB_cases.pdf) (accessed October 20, 2019).
- 419 3. NHS Digital. Primary Care registrations. 2019. <https://digital.nhs.uk/services/nhais/primary-care-registration> (accessed February 15, 2020).
- 420 4. Panchal RK, Browne I, Monk P, Woltmann G, Haldar P. The effectiveness of primary care  
421 based risk stratification for targeted latent tuberculosis infection screening in recent immigrants to  
422 the UK: a retrospective cohort study. *Thorax* 2014; **69**(4): 354-62.
- 423 5. Ministry of Housing, Communities & Local Government. English indices of deprivation 2015.  
424 2015. <https://www.gov.uk/government/statistics/english-indices-of-deprivation-2015> (accessed  
425 February 10, 2020).
- 426 6. Aldridge RW, Shaji K, Hayward AC, Abubakar I. Accuracy of Probabilistic Linkage Using the  
427 Enhanced Matching System for Public Health and Epidemiological Studies. *Plos One* 2015; **10**(8).
- 428 7. Berrocal-Almanza LC, Harris R, Lalor MK, et al. Effectiveness of pre-entry active tuberculosis  
429 and post-entry latent tuberculosis screening in new entrants to the UK: a retrospective, population-  
430 based cohort study. *Lancet Infectious Diseases* 2019; **19**(11): 1191-201.
- 431 8. StataCorp. Multiple-imputation reference manual. Stata: Release 15.  
432 Statistical Software. College Station, TX: StataCorp LLC; 2017.

436

437
